# Supplementary material for: A low-cost DAC BIST structure using a resistor loop
Source: PLoS One. 2017 Feb 17;12(2):e0172331. doi: 10.1371/journal.pone.0172331 (PMC5315403; doi:10.1371/journal.pone.0172331)
Supplement: S1 File — The data contain switch effect from 6-bit DDEM ADC to 12-bit DDEM ADC in the conventional method, previous work and proposed BIST. Every sheet shows the switch effect for all voltage sources (1/2n to 2n/2n) while n is the resolution of the DDEM ADCs. (XLSX) [file pone.0172331.s001.xlsx]

## Sheet: Sheet1
0.004808	0.007919
0.009615	0.002262
0.014423	0.003394
0.019231	0.00905
0.024038	0.004525
0.028846	0.001131
0.033654	0.006787
0.038462	0.006787
0.043269	0.001131
0.048077	0.004525
0.052885	0.00905
0.057692	0.003394
0.0625	0.002262
0.067308	0.007919
0.072115	0.005656
0.076923	0
0.081731	0.005656
0.086538	0.007919
0.091346	0.002262
0.096154	0.003394
0.100962	0.00905
0.105769	0.004525
0.110577	0.001131
0.115385	0.006787
0.120192	0.006787
0.125	0.001131
0.129808	0.004525
0.134615	0.00905
0.139423	0.003394
0.144231	0.002262
0.149038	0.007919
0.153846	0.005656
0.158654	0
0.163462	0.005656
0.168269	0.007919
0.173077	0.002262
0.177885	0.003394
0.182692	0.00905
0.1875	0.004525
0.192308	0.001131
0.197115	0.006787
0.201923	0.006787
0.206731	0.001131
0.211538	0.004525
0.216346	0.00905
0.221154	0.003394
0.225962	0.002262
0.230769	0.007919
0.235577	0.005656
0.240385	0
0.245192	0.005656
0.25	0.007919
0.254808	0.002262
0.259615	0.003394
0.264423	0.00905
0.269231	0.004525
0.274038	0.001131
0.278846	0.006787
0.283654	0.006787
0.288462	0.001131
0.293269	0.004525
0.298077	0.00905
0.302885	0.003394
	0.002262

## Sheet: Simulation Environment
DAC benchmark	6-bit current-steering DAC	2.6mm * 4.6mm	T. Zaki, F. Ante, J. Butschke, F. Letzkus, H. Richter, H. Klauk and J. N. Burghartz, "A 3.3 V 6-Bit 100kS/s Current-Steering Digital-to-Analog Converter Using Organic P-Type Thin-Film Transistors on Glass," IEEE Journal of Solid-State-Circuits, vol.47, no.1, 2012
Library	HL3S-S3.8	0.35um, 3.3V
Area overhead	INVX1	1.4079
	MUX	3.7544
	NAND	1.8772
	Swtich	4.4

## Sheet: Area overhead
	Normalized Value				Estimated Value(um2)
	Conventional	Previous	Proposed		Conventional	Previous	Proposed
6-bit	64	49	49		844.8	646.8	646.8
7-bit	128	107	107		1689.6	1412.4	1412.4
8-bit	256	214	211		3379.2	2824.8	2785.2
9-bit	512	455	423		6758.4	6006	5583.6
10-bit	1024	935	927		13516.8	12342	12236.4
11-bit	2048	1762	1761		27033.6	23258.4	23245.2
12-bit	4096	3519	3322		54067.2	46450.8	43850.4

## Sheet: Error
	Estimated			Voltage (mV)				LSB
	Conventional	Previous	Proposed	Conventional	Previous	Proposed	1LSB	Conventional	Previous	Proposed
6-bit	0.25	0.0647877	0.0273653	6.12305	1.64324	0.69408	25.7812	0.2375	0.0637379	0.0269219
7-bit	0.25	0.290961	0.0414053	3.06152	3.3756	0.559072	12.8906	0.2375	0.261865	0.0433704
8-bit	0.25	0.239723	0.0164408	1.53076	1.39058	0.0914491	6.44531	0.2375	0.215751	0.0141885
9-bit	0.25	0.705692	0.0204658	0.765381	2.04678	0.167557	3.22266	0.2375	0.635123	0.0519933
10-bit	0.25	1.08579	0.00740831	0.38269	1.57461	0.0466607	1.61133	0.2375	0.97721	0.0289579
11-bit	0.25	0.329293	0.0173531	0.191345	0.238769	0.0165736	0.805664	0.2375	0.296363	0.0205713
12-bit	0.25	0.622759	0.0185513	0.0956726	0.225781	0.0167541	0.402832	0.2375	0.560483	0.0415909

## Sheet: 6bit
Voltage source	Conventional	Previous	Proposed
1	0.00769231	0.153061	0.011316
2	0.0153846	0.081633	0.010549
3	0.0230769	0.112245	0.00537
4	0.0307692	0.040816	0.006137
5	0.0384615	0.132653	0.008247
6	0.0461538	0.081633	0.00748
7	0.0538462	0.153061	0.006713
8	0.0615385	0.081633	0.021097
9	0.0692308	0.071429	0.009973
10	0.0769231	0.081633	0.034714
11	0.0846154	0.030612	0.049099
12	0.0923077	0.020408	0.012275
13	0.1	0.05102	0.043345
14	0.107692	0.081633	0.001343
15	0.115385	0.112245	0.044879
16	0.123077	0.040816	0.000192
17	0.130769	0.091837	0.031262
18	0.138462	0.061224	0.013425
19	0.146154	0.091837	0.032796
20	0.153846	0.142857	0.027043
21	0.161538	0.071429	0.019179
22	0.169231	0	0.04066
23	0.176923	0.030612	0.005562
24	0.184615	0.040816	0.051784
25	0.192308	0.05102	0.008055
26	0.2	0.020408	0.053318
27	0.207692	0.071429	0.006521
28	0.215385	0.102041	0.06636
29	0.223077	0.091837	0.010165
30	0.230769	0.122449	0.049674
31	0.238462	0.153061	0.026851
32	0.246154	0.081633	0.032988
33	0.253846	0.030612	0.043537
34	0.261538	0.020408	0.016302
35	0.269231	0.05102	0.060222
36	0.276923	0.061224	0.000384
37	0.284615	0.010204	0.059455
38	0.292308	0.040816	0.032221
39	0.3	0.030612	0.027618
40	0.307692	0.102041	0.064058
41	0.315385	0.071429	0.004219
42	0.323077	0.040816	0.055619
43	0.330769	0.010204	0.020905
44	0.338462	0.020408	0.038934
45	0.346154	0.030612	0.037591
46	0.353846	0.040816	0.022248
47	0.361538	0.010204	0.054277
48	0.369231	0	0.005562
49	0.376923	0.030612	0.065401
50	0.384615	0.020408	0.011124
51	0.392308	0.05102	0.048715
52	0.4	0.020408	0.012658
53	0.407692	0.05102	0.047181
54	0.415385	0.040816	0.014193
55	0.423077	0.010204	0.030495
56	0.430769	0.040816	0.04603
57	0.438462	0.112245	0.013809
58	0.446154	0.040816	0.032413
59	0.453846	0.112245	0.027426
60	0.461538	0.040816	0.003644
61	0.469231	0.132653	0.034714
62	0.476923	0.102041	0.02033
63	0.484615	0.153061	0.024357
64	0.492308	0.153061	0.02359
Average	0.25	0.0647877	0.0273653
mV	6.34087	1.64324	0.69408
1LSB (mV)	25.7812

## Sheet: 7bit
Voltage source	Conventional	Previous	Proposed
1	0.00387597	0	0.027863
2	0.00775194	0.098131	0.000472
3	0.0116279	0.11215	0.002125
4	0.0155039	0.098131	0.003542
5	0.0193798	0.121495	0.000945
6	0.0232558	0.135514	0.009917
7	0.0271318	0.168224	0.004014
8	0.0310078	0.191589	0.001417
9	0.0348837	0.149533	0.009445
10	0.0387597	0.14486	0.003778
11	0.0426357	0.168224	0.010153
12	0.0465116	0.135514	0.000708
13	0.0503876	0.149533	0.01157
14	0.0542636	0.126168	0.005903
15	0.0581395	0.149533	0.008028
16	0.0620155	0.070093	0.002834
17	0.0658915	0.102804	0.02196
18	0.0697674	0.107477	0.016765
19	0.0736434	0.037383	0.005903
20	0.0775194	0.03271	0.021488
21	0.0813953	0	0.024085
22	0.0852713	0.03271	0.001889
23	0.0891473	0.037383	0.004486
24	0.0930233	0.03271	0.01771
25	0.0968992	0.102804	0.017946
26	0.100775	0.135514	0.020779
27	0.104651	0.168224	0.018182
28	0.108527	0.21028	0.034002
29	0.112403	0.242991	0.004723
30	0.116279	0.247664	0.014404
31	0.120155	0.28972	0.025266
32	0.124031	0.313084	0.029988
33	0.127907	0.345794	0.013932
34	0.131783	0.359813	0.033058
35	0.135659	0.336449	0.038725
36	0.139535	0.378505	0.019599
37	0.143411	0.429907	0.016057
38	0.147287	0.453271	0.039197
39	0.151163	0.392523	0.011806
40	0.155039	0.434579	0.00732
41	0.158915	0.392523	0.034711
42	0.162791	0.425234	0.028808
43	0.166667	0.476636	0.015112
44	0.170543	0.434579	0.048406
45	0.174419	0.401869	0.021015
46	0.178295	0.415888	0.01464
47	0.182171	0.373832	0.050295
48	0.186047	0.406542	0.021488
49	0.189922	0.514019	0.014168
50	0.193798	0.425234	0.049823
51	0.197674	0.392523	0.02196
52	0.20155	0.453271	0.013695
53	0.205426	0.476636	0.049351
54	0.209302	0.443925	0.022432
55	0.213178	0.485981	0.013223
56	0.217054	0.471963	0.048878
57	0.22093	0.429907	0.022904
58	0.224806	0.528037	0.021015
59	0.228682	0.523364	0.050767
60	0.232558	0.453271	0.015112
61	0.236434	0.457944	0.020543
62	0.24031	0.443925	0.05124
63	0.244186	0.514019	0.00732
64	0.248062	0.518692	0.0366
65	0.251938	0.551402	0.035183
66	0.255814	0.471963	0.008737
67	0.25969	0.504673	0.052656
68	0.263566	0.443925	0.019126
69	0.267442	0.53271	0.033058
70	0.271318	0.434579	0.038725
71	0.275194	0.485981	0.005195
72	0.27907	0.481308	0.049115
73	0.282946	0.448598	0.022668
74	0.286822	0.462617	0.021251
75	0.290698	0.551402	0.050531
76	0.294574	0.509346	0.006612
77	0.29845	0.364486	0.045573
78	0.302326	0.397196	0.02621
79	0.306202	0.46729	0.01771
80	0.310078	0.5	0.054073
81	0.313953	0.308411	0.010153
82	0.317829	0.38785	0.033766
83	0.321705	0.327103	0.038017
84	0.325581	0.359813	0.005903
85	0.329457	0.373832	0.041558
86	0.333333	0.369159	0.030224
87	0.337209	0.308411	0.005431
88	0.341085	0.350467	0.049351
89	0.344961	0.345794	0.022432
90	0.348837	0.32243	0.013223
91	0.352713	0.336449	0.050295
92	0.356589	0.303738	0.006375
93	0.360465	0.28972	0.021015
94	0.364341	0.313084	0.040142
95	0.368217	0.35514	0.023377
96	0.372093	0.285047	0.028808
97	0.375969	0.261682	0.009917
98	0.379845	0.266355	0.034002
99	0.383721	0.261682	0.03778
100	0.387597	0.247664	0.002125
101	0.391473	0.186916	0.032586
102	0.395349	0.21028	0.00307
103	0.399225	0.205607	0.038725
104	0.403101	0.182243	0.008264
105	0.406977	0.196262	0.010862
106	0.410853	0.21028	0.019599
107	0.414729	0.168224	0.024321
108	0.418605	0.172897	0.022668
109	0.422481	0.186916	0.012987
110	0.426357	0.14486	0.025738
111	0.430233	0.186916	0.026446
112	0.434109	0.172897	0.028808
113	0.437984	0.205607	0.023377
114	0.44186	0.200935	0.009445
115	0.445736	0.233645	0.003778
116	0.449612	0.228972	0.08902
117	0.453488	0.242991	0.032349
118	0.457364	0.219626	0.267769
119	0.46124	0.233645	0.179457
120	0.465116	0.219626	0.09941
121	0.468992	0.196262	0.110272
122	0.472868	0.219626	0.228571
123	0.476744	0.186916	0.264227
124	0.48062	0.135514	0.225502
125	0.484496	0.11215	0.310744
126	0.488372	0.098131	0.189374
127	0.492248	0.102804	0.348996
128	0.496124	0.098131	0.41771
	0.25	0.290961	0.0414053

## Sheet: 8bit
Voltage source	Conventional	Previous	Proposed
1	0.00194553	0	0.001214
2	0.00389105	0.098131	0.001037
3	0.00583658	0.11215	0.000696
4	0.0077821	0.121495	0.001555
5	0.00972763	0.130841	0.000178
6	0.0116732	0.126168	0.001911
7	0.0136187	0.140187	0.003643
8	0.0155642	0.079439	0.002592
9	0.0175097	0.093458	0.003125
10	0.0194553	0.060748	0.00311
11	0.0214008	0.042056	0.002607
12	0.0233463	0.028037	0.000355
13	0.0252918	0.065421	0.001896
14	0.0272374	0.004673	0.003821
15	0.0291829	0.014019	0.00157
16	0.0311284	0.018692	0.003303
17	0.0330739	0.028037	0.001052
18	0.0350195	0.023364	0.002784
19	0.036965	0.037383	0.004517
20	0.0389105	0.056075	0.002266
21	0.040856	0.037383	0.003969
22	0.0428016	0.014019	0.001748
23	0.0447471	0.009346	0.004488
24	0.0466926	0.009346	0.001229
25	0.0486381	0.009346	0.005006
26	0.0505837	0.014019	0.004695
27	0.0525292	0.042056	0.002444
28	0.0544747	0.046729	0.000193
29	0.0564202	0.051402	0.002059
30	0.0583658	0.060748	0.007642
31	0.0603113	0.088785	0.006561
32	0.0622568	0.098131	0.007124
33	0.0642023	0.079439	0.000889
34	0.0661479	0.079439	0.006606
35	0.0680934	0.130841	0.007598
36	0.0700389	0.088785	0.005865
37	0.0719844	0.074766	0.000148
38	0.07393	0.074766	0.005569
39	0.0758755	0.070093	0.008635
40	0.077821	0.084112	0.009034
41	0.0797665	0.088785	0.002799
42	0.0817121	0.074766	0.000548
43	0.0836576	0.163551	0.006265
44	0.0856031	0.14486	0.004014
45	0.0875486	0.11215	0.001762
46	0.0894942	0.214953	0.011463
47	0.0914397	0.191589	0.00274
48	0.0933852	0.163551	0.006961
49	0.0953307	0.196262	0.007242
50	0.0972763	0.205607	0.006443
51	0.0992218	0.242991	0.01216
52	0.101167	0.21028	0.006028
53	0.103113	0.158879	0.008279
54	0.105058	0.205607	0.00939
55	0.107004	0.228972	0.011123
56	0.108949	0.224299	0.007065
57	0.110895	0.238318	0.001348
58	0.11284	0.233645	0.000385
59	0.114786	0.266355	0.001866
60	0.116732	0.294393	0.000133
61	0.118677	0.271028	0.010353
62	0.120623	0.266355	0.000652
63	0.122568	0.257009	0.009049
64	0.124514	0.271028	0.009138
65	0.126459	0.294393	0.012515
66	0.128405	0.261682	0.009657
67	0.13035	0.275701	4.4e-05
68	0.132296	0.303738	0.002207
69	0.134241	0.345794	0.004458
70	0.136187	0.294393	0.002725
71	0.138132	0.299065	0.000992
72	0.140078	0.275701	0.012693
73	0.142023	0.271028	0.013463
74	0.143969	0.327103	0.004206
75	0.145914	0.299065	0.005939
76	0.14786	0.247664	0.008264
77	0.149805	0.331776	0.002547
78	0.151751	0.261682	0.008783
79	0.153696	0.299065	0.008886
80	0.155642	0.327103	0.005317
81	0.157588	0.299065	0.012352
82	0.159533	0.378505	0.005835
83	0.161479	0.392523	0.003866
84	0.163424	0.369159	0.009582
85	0.16537	0.448598	0.015299
86	0.167315	0.411215	0.01484
87	0.169261	0.425234	0.013107
88	0.171206	0.457944	0.000578
89	0.173152	0.457944	0.01761
90	0.175097	0.429907	0.011893
91	0.177043	0.401869	0.00976
92	0.178988	0.420561	0.016395
93	0.180934	0.392523	0.001274
94	0.182879	0.415888	0.006991
95	0.184825	0.345794	0.007213
96	0.18677	0.308411	0.006472
97	0.188716	0.383178	0.015699
98	0.190661	0.317757	0.002014
99	0.192607	0.383178	0.016218
100	0.194553	0.350467	0.00942
101	0.196498	0.359813	0.008768
102	0.198444	0.434579	0.008901
103	0.200389	0.294393	0.009286
104	0.202335	0.331776	0.003569
105	0.20428	0.285047	0.017773
106	0.206226	0.214953	0.000104
107	0.208171	0.252336	0.009597
108	0.210117	0.21028	0.016558
109	0.212062	0.247664	0.006857
110	0.214008	0.214953	0.00114
111	0.215953	0.149533	0.000592
112	0.217899	0.158879	0.001659
113	0.219844	0.261682	0.012026
114	0.22179	0.186916	0.017743
115	0.223735	0.098131	0.00354
116	0.225681	0.228972	0.00668
117	0.227626	0.228972	0.014974
118	0.229572	0.271028	0.011182
119	0.231518	0.158879	0.009449
120	0.233463	0.088785	0.012204
121	0.235409	0.242991	0.005984
122	0.237354	0.126168	0.019654
123	0.2393	0.107477	0.013418
124	0.241245	0.065421	0.007183
125	0.243191	0.158879	0.0129
126	0.245136	0.294393	0.001303
127	0.247082	0.130841	0.00043
128	0.249027	0.158879	0.001822
129	0.250973	0.233645	0.004073
130	0.252918	0.140187	0.014292
131	0.254864	0.130841	0.011345
132	0.256809	0.14486	0.00511
133	0.258755	0.116822	0.013078
134	0.2607	0.135514	0.015329
135	0.262646	0.098131	0.010308
136	0.264591	0.051402	8.9e-05
137	0.266537	0.079439	0.001822
138	0.268482	0.051402	0.00043
139	0.270428	0.028037	0.005287
140	0.272374	0.037383	0.004932
141	0.274319	0.009346	0.003199
142	0.276265	0.028037	0.00545
143	0.27821	0.065421	0.007702
144	0.280156	0.126168	0.017936
145	0.282101	0.051402	0.000252
146	0.284047	0.051402	0.010471
147	0.285992	0.116822	0.008738
148	0.287938	0.191589	0.000963
149	0.289883	0.172897	0.005273
150	0.291829	0.186916	0.019476
151	0.293774	0.252336	0.018113
152	0.29572	0.233645	0.015862
153	0.297665	0.294393	0.002325
154	0.299611	0.280374	0.000592
155	0.301556	0.257009	0.010812
156	0.303502	0.35514	0.001111
157	0.305447	0.247664	0.019298
158	0.307393	0.280374	0.009597
159	0.309339	0.35514	0.01604
160	0.311284	0.247664	0.0141
161	0.31323	0.345794	0.003569
162	0.315175	0.271028	0.009286
163	0.317121	0.331776	0.018987
164	0.319066	0.406542	0.0008
165	0.321012	0.35514	0.014485
166	0.322957	0.378505	0.004265
167	0.324903	0.369159	0.005954
168	0.326848	0.411215	0.015699
169	0.328794	0.429907	0.010456
170	0.330739	0.420561	0.011197
171	0.332685	0.425234	0.006991
172	0.33463	0.401869	0.014663
173	0.336576	0.462617	0.003525
174	0.338521	0.359813	0.018128
175	0.340467	0.38785	0.004043
176	0.342412	0.364486	0.01761
177	0.344358	0.350467	0.004562
178	0.346304	0.38785	0.005139
179	0.348249	0.364486	0.013048
180	0.350195	0.364486	0.011315
181	0.35214	0.415888	0.001614
182	0.354086	0.383178	0.008087
183	0.356031	0.415888	0.017788
184	0.357977	0.420561	0.008368
185	0.359922	0.415888	0.005317
186	0.361868	0.453271	0.016855
187	0.363813	0.476636	0.008783
188	0.365759	0.495327	0.005421
189	0.367704	0.523364	0.012248
190	0.36965	0.495327	0.005939
191	0.371595	0.514019	0.000222
192	0.373541	0.490654	0.013463
193	0.375486	0.495327	0.008709
194	0.377432	0.481308	0.012945
195	0.379377	0.495327	0.017195
196	0.381323	0.5	0.004458
197	0.383268	0.495327	0.002207
198	0.385214	0.485981	0.015892
199	0.38716	0.434579	0.014248
200	0.389105	0.415888	0.008531
201	0.391051	0.401869	0.014766
202	0.392996	0.373832	0.013033
203	0.394942	0.373832	0.00862
204	0.396887	0.345794	0.014337
205	0.398833	0.32243	0.012085
206	0.400778	0.364486	0.006102
207	0.402724	0.378505	0.003599
208	0.404669	0.35514	0.0133
209	0.406615	0.336449	0.004888
210	0.40856	0.331776	0.012782
211	0.410506	0.345794	0.006546
212	0.412451	0.373832	0.000311
213	0.414397	0.345794	0.00194
214	0.416342	0.32243	0.004191
215	0.418288	0.345794	0.013478
216	0.420233	0.285047	0.00471
217	0.422179	0.280374	0.008975
218	0.424125	0.28972	0.009212
219	0.42607	0.247664	0.000489
220	0.428016	0.252336	0.009731
221	0.429961	0.275701	3e-05
222	0.431907	0.238318	0.006265
223	0.433852	0.303738	0.008516
224	0.435798	0.252336	0.002799
225	0.437743	0.266355	0.010886
226	0.439689	0.261682	0.000666
227	0.441634	0.242991	0.002399
228	0.44358	0.238318	0.00782
229	0.445525	0.233645	0.006087
230	0.447471	0.238318	0.004354
231	0.449416	0.238318	0.013315
232	0.451362	0.224299	0.004873
233	0.453307	0.186916	0.007124
234	0.455253	0.205607	0.010545
235	0.457198	0.196262	0.003658
236	0.459144	0.200935	0.005909
237	0.461089	0.214953	0.003792
238	0.463035	0.228972	0.009508
239	0.464981	0.21028	0.023193
240	0.466926	0.200935	0.00899
241	0.468872	0.182243	0.062516
242	0.470817	0.168224	0.052296
243	0.472763	0.14486	0.077934
244	0.474708	0.135514	0.087635
245	0.476654	0.149533	0.117256
246	0.478599	0.135514	0.134925
247	0.480545	0.126168	0.156578
248	0.48249	0.14486	0.158311
249	0.484436	0.130841	0.168012
250	0.486381	0.149533	0.181697
251	0.488327	0.182243	0.171478
252	0.490272	0.130841	0.157274
253	0.492218	0.14486	0.182911
254	0.494163	0.121495	0.232453
255	0.496109	0.11215	0.250122
256	0.498054	0.098131	0.251855
	0.25	0.239723	0.0164408

## Sheet: 9bit
Voltage source	Conventional	Previous	Proposed
1	0.000974659	0	0.000279
2	0.00194932	0.062637	0.006331
3	0.00292398	0.065934	0.002526
4	0.00389864	0.073626	0.000803
5	0.00487329	0.079121	0.000919
6	0.00584795	0.102198	0.003608
7	0.00682261	0.114286	0.002281
8	0.00779727	0.130769	0.00433
9	0.00877193	0.145055	0.00469
10	0.00974659	0.163736	0.000885
11	0.0107212	0.173626	0.000838
12	0.0116959	0.174725	0.005773
13	0.0126706	0.173626	0.006134
14	0.0136452	0.187912	0.001839
15	0.0146199	0.197802	0.000605
16	0.0155945	0.201099	0.005284
17	0.0165692	0.202198	0.005493
18	0.0175439	0.205495	0.007938
19	0.0185185	0.213187	3.5e-05
20	0.0194932	0.227473	0.004493
21	0.0204678	0.237363	0.001397
22	0.0214425	0.251648	0.005203
23	0.0224172	0.252747	0.001408
24	0.0233918	0.258242	0.000314
25	0.0243665	0.279121	0.00213
26	0.0253411	0.295604	0.004574
27	0.0263158	0.303297	0.007018
28	0.0272904	0.328571	0.001129
29	0.0282651	0.36044	0.000594
30	0.0292398	0.368132	0.006483
31	0.0302144	0.375824	0.002211
32	0.0311891	0.379121	0.000489
33	0.0321637	0.413187	0.00085
34	0.0331384	0.414286	0.003294
35	0.0341131	0.432967	0.009905
36	0.0350877	0.449451	0.008485
37	0.0360624	0.476923	0.001874
38	0.037037	0.486813	0.00682
39	0.0380117	0.494505	0.011348
40	0.0389864	0.502198	0.013291
41	0.039961	0.505495	0.007903
42	0.0409357	0.524176	0.014653
43	0.0419103	0.523077	0.000291
44	0.042885	0.53956	0.006902
45	0.0438596	0.542857	0.009404
46	0.0448343	0.543956	0.011127
47	0.045809	0.556044	0.010766
48	0.0467836	0.574725	0.016655
49	0.0477583	0.597802	0.012128
50	0.0487329	0.583516	0.006983
51	0.0497076	0.602198	0.007239
52	0.0506823	0.607692	0.002712
53	0.0516569	0.624176	0.000268
54	0.0526316	0.616484	0.012407
55	0.0536062	0.657143	0.014129
56	0.0545809	0.673626	0.013769
57	0.0555556	0.679121	0.013408
58	0.0565302	0.68022	0.010964
59	0.0575049	0.703297	0.000186
60	0.0584795	0.706593	0.012675
61	0.0594542	0.734066	0.002619
62	0.0604288	0.741758	0.000896
63	0.0614035	0.764835	0.011243
64	0.0623782	0.783516	0.008799
65	0.0633528	0.78022	0.010521
66	0.0643275	0.796703	0.016411
67	0.0653021	0.824176	0.018133
68	0.0662768	0.801099	0.005272
69	0.0672515	0.815385	0.000745
70	0.0682261	0.823077	0.010801
71	0.0692008	0.848352	0.006227
72	0.0701754	0.867033	0.016329
73	0.0711501	0.854945	0.015282
74	0.0721248	0.869231	0.019774
75	0.0730994	0.892308	0.005587
76	0.0740741	0.884615	0.008636
77	0.0750487	0.907692	5.8e-05
78	0.0760234	0.893407	0.020414
79	0.0769981	0.945055	0.017446
80	0.0779727	0.937363	0.009276
81	0.0789474	0.92967	0.011918
82	0.079922	0.932967	0.004388
83	0.0808967	0.984615	0.004027
84	0.0818713	0.992308	0.0005
85	0.082846	0.993407	0.002945
86	0.0838207	1.0011	0.000861
87	0.0847953	1.01538	0.010917
88	0.08577	1.02747	0.008194
89	0.0867446	1.05055	0.022696
90	0.0877193	1.05165	0.007751
91	0.088694	1.03516	0.009276
92	0.0896686	1.11319	0.020054
93	0.0906433	1.09011	0.010836
94	0.0916179	1.1044	0.014642
95	0.0925926	1.1011	0.010114
96	0.0935673	1.13516	0.015247
97	0.0945419	1.15604	0.019809
98	0.0955166	1.13516	0.003468
99	0.0964912	1.16484	0.012162
100	0.0974659	1.14835	0.00831
101	0.0984405	1.1956	0.012116
102	0.0994152	1.16813	0.024255
103	0.10039	1.2022	0.025978
104	0.101365	1.18791	0.007716
105	0.102339	1.2	0.014327
106	0.103314	1.2033	0.010312
107	0.104288	1.23956	0.025466
108	0.105263	1.22088	0.00291
109	0.106238	1.22418	0.013396
110	0.107212	1.24506	0.025535
111	0.108187	1.25275	0.021008
112	0.109162	1.27143	0.00227
113	0.110136	1.26154	0.000547
114	0.111111	1.26483	0.017842
115	0.112086	1.31868	0.013769
116	0.11306	1.28681	0.000454
117	0.114035	1.31429	0.02301
118	0.11501	1.33516	0.004434
119	0.115984	1.36923	0.023545
120	0.116959	1.34176	0.003073
121	0.117934	1.32527	0.024267
122	0.118908	1.33956	0.021206
123	0.119883	1.38901	0.014572
124	0.120858	1.36374	0.000349
125	0.121832	1.37582	0.015293
126	0.122807	1.36374	0.023929
127	0.123782	1.39121	0.019402
128	0.124756	1.39011	0.028876
129	0.125731	1.35824	0.029236
130	0.126706	1.38132	0.009986
131	0.12768	1.38461	0.007542
132	0.128655	1.42088	0.013431
133	0.12963	1.38022	0.016096
134	0.130604	1.36813	0.008124
135	0.131579	1.39341	0.026932
136	0.132554	1.41429	0.001571
137	0.133528	1.40659	0.000873
138	0.134503	1.41868	0.01165
139	0.135478	1.41978	0.000489
140	0.136452	1.41648	0.012372
141	0.137427	1.41319	0.024767
142	0.138402	1.41209	0.01101
143	0.139376	1.45275	0.011371
144	0.140351	1.41868	0.011185
145	0.141326	1.46593	0.014176
146	0.1423	1.42967	0.018703
147	0.143275	1.47033	0.025314
148	0.14425	1.44066	0.000675
149	0.145224	1.45934	0.007286
150	0.146199	1.47143	0.029853
151	0.147173	1.43736	0.029493
152	0.148148	1.45165	0.018715
153	0.149123	1.48132	0.017062
154	0.150097	1.49121	0.01534
155	0.151072	1.48571	0.030133
156	0.152047	1.46264	0.006855
157	0.153021	1.47473	0.000244
158	0.153996	1.47143	0.0228
159	0.154971	1.5033	0.007856
160	0.155945	1.44286	0.011662
161	0.15692	1.46593	0.000885
162	0.157895	1.47143	0.02656
163	0.158869	1.4967	0.02692
164	0.159844	1.48901	0.018948
165	0.160819	1.4967	0.005691
166	0.161793	1.45385	0.013664
167	0.162768	1.4989	0.000803
168	0.163743	1.48242	0.000442
169	0.164717	1.46813	0.012581
170	0.165692	1.46264	0.005971
171	0.166667	1.48571	0.002723
172	0.167641	1.46044	0.009334
173	0.168616	1.45275	0.006972
174	0.169591	1.44945	0.025361
175	0.170565	1.47033	0.00625
176	0.17154	1.46484	0.006611
177	0.172515	1.46813	0.005528
178	0.173489	1.47143	0.001001
179	0.174464	1.44396	0.03189
180	0.175439	1.48462	0.029446
181	0.176413	1.46374	0.027002
182	0.177388	1.44725	0.020391
183	0.178363	1.48791	0.00497
184	0.179337	1.43407	0.019669
185	0.180312	1.48352	0.010975
186	0.181287	1.43846	0.010615
187	0.182261	1.41538	0.02067
188	0.183236	1.52637	0.033857
189	0.184211	1.53626	0.000885
190	0.185185	1.48901	0.015421
191	0.18616	1.47033	0.022439
192	0.187135	1.47143	0.000116
193	0.188109	1.52967	0.012256
194	0.189084	1.5	0.013105
195	0.190058	1.45055	0.032367
196	0.191033	1.51758	0.01534
197	0.192008	1.45275	0.032938
198	0.192982	1.42088	0.002048
199	0.193957	1.42857	0.004493
200	0.194932	1.43626	0.00973
201	0.195906	1.54066	0.009381
202	0.196881	1.43187	0.028492
203	0.197856	1.38901	0.000314
204	0.19883	1.37033	0.024953
205	0.199805	1.38681	0.023324
206	0.20078	1.42308	0.028399
207	0.201754	1.34505	0.024046
208	0.202729	1.37253	0.00774
209	0.203704	1.38461	0.012733
210	0.204678	1.41429	0.006378
211	0.205653	1.35604	0.024511
212	0.206628	1.32418	0.036266
213	0.207602	1.32088	0.027956
214	0.208577	1.41429	0.035929
215	0.209552	1.35824	0.008182
216	0.210526	1.35934	0.006041
217	0.211501	1.35385	0.017237
218	0.212476	1.36154	0.019681
219	0.21345	1.2967	0.024209
220	0.214425	1.35714	0.021264
221	0.2154	1.30769	0.033403
222	0.216374	1.3	0.031541
223	0.217349	1.36484	0.034765
224	0.218324	1.3044	0.009346
225	0.219298	1.32527	0.004877
226	0.220273	1.31758	0.004516
227	0.221248	1.29011	0.039595
228	0.222222	1.37033	0.018378
229	0.223197	1.28571	0.009683
230	0.224172	1.20989	0.032239
231	0.225146	1.26593	0.040212
232	0.226121	1.20989	0.004434
233	0.227096	1.22418	0.00426
234	0.22807	1.31319	0.037046
235	0.229045	1.22637	0.009602
236	0.230019	1.27582	0.022009
237	0.230994	1.22418	0.02862
238	0.231969	1.1989	0.01023
239	0.232943	1.14945	0.037325
240	0.233918	1.13297	0.000535
241	0.234893	1.2044	0.030354
242	0.235867	1.16813	0.026257
243	0.236842	1.13846	0.027549
244	0.237817	1.07143	0.018855
245	0.238791	1.03956	0.016923
246	0.239766	1.08022	0.031867
247	0.240741	1.04176	0.015689
248	0.241715	1.04506	0.011162
249	0.24269	0.993407	0.000384
250	0.243665	1.17253	0.004143
251	0.244639	1.0044	0.035754
252	0.245614	0.985714	0.009032
253	0.246589	1.0044	0.011476
254	0.247563	1.08901	0.000663
255	0.248538	1.0044	0.035719
256	0.249513	1.01429	0.018808
257	0.250487	0.931868	0.033752
258	0.251462	0.979121	0.01953
259	0.252437	0.971429	0.005307
260	0.253411	1.00769	0.034835
261	0.254386	0.931868	0.010638
262	0.255361	0.935165	0.045694
263	0.256335	0.881319	0.045333
264	0.25731	0.816484	0.015805
265	0.258285	0.802198	0.032472
266	0.259259	0.798901	0.029667
267	0.260234	0.817582	0.029306
268	0.261209	0.741758	0.027304
269	0.262183	0.685714	0.018168
270	0.263158	0.763736	0.011359
271	0.264133	0.707692	0.002863
272	0.265107	0.662637	0.019169
273	0.266082	0.654945	0.002142
274	0.267057	0.627473	0.041364
275	0.268031	0.617582	0.013163
276	0.269006	0.682418	0.003142
277	0.269981	0.584615	0.004865
278	0.270955	0.587912	0.031588
279	0.27193	0.641758	2.3e-05
280	0.272904	0.653846	0.004551
281	0.273879	0.586813	0.015328
282	0.274854	0.53956	0.021939
283	0.275828	0.518681	0.0277
284	0.276803	0.559341	0.012756
285	0.277778	0.501099	0.023021
286	0.278752	0.497802	0.031716
287	0.279727	0.498901	0.026257
288	0.280702	0.495604	0.02827
289	0.281676	0.472527	0.000535
290	0.282651	0.418681	0.037325
291	0.283626	0.367033	0.012314
292	0.2846	0.394505	0.02862
293	0.285575	0.358242	0.028259
294	0.28655	0.368132	0.000815
295	0.287524	0.29011	0.030796
296	0.288499	0.365934	0.006343
297	0.289474	0.327473	0.003899
298	0.290448	0.28022	0.033962
299	0.291423	0.276923	0.025989
300	0.292398	0.242857	0.0076
301	0.293372	0.272527	0.018378
302	0.294347	0.223077	0.037488
303	0.295322	0.167033	0.007984
304	0.296296	0.234066	0.007623
305	0.297271	0.331868	0.026013
306	0.298246	0.286813	0.022265
307	0.29922	0.331868	0.035126
308	0.300195	0.168132	0.016736
309	0.30117	0.243956	0.008764
310	0.302144	0.26044	0.034125
311	0.303119	0.259341	0.036569
312	0.304094	0.291209	0.039013
313	0.305068	0.195604	0.029376
314	0.306043	0.192308	0.029318
315	0.307018	0.125275	0.003655
316	0.307992	0.135165	0.011627
317	0.308967	0.116484	0.002933
318	0.309942	0.102198	0.029655
319	0.310916	0.085714	0.020705
320	0.311891	0.113187	0.039816
321	0.312865	0.035165	0.013094
322	0.31384	0.016484	0.021962
323	0.314815	0.01978	0.038268
324	0.315789	0.058242	0.021241
325	0.316764	0.032967	0.02912
326	0.317739	0.051648	0.005936
327	0.318713	0.010989	0.027758
328	0.319688	0.001099	0.026047
329	0.320663	0.043956	0.004853
330	0.321637	0.007692	0.027409
331	0.322612	0.037363	0.022882
332	0.323587	0.075824	0.021229
333	0.324561	0.008791	0.00966
334	0.325536	0.042857	0.003201
335	0.326511	0.048352	0.020228
336	0.327485	0.049451	0.018994
337	0.32846	0.004396	0.033217
338	0.329435	0.056044	0.012977
339	0.330409	0.112088	0.028329
340	0.331384	0.108791	0.032449
341	0.332359	0.074725	0.006774
342	0.333333	0.097802	0.018913
343	0.334308	0.096703	0.035219
344	0.335283	0.130769	0.032775
345	0.336257	0.114286	0.021997
346	0.337232	0.132967	0.022114
347	0.338207	0.182418	0.021276
348	0.339181	0.205495	0.014665
349	0.340156	0.173626	0.016387
350	0.341131	0.225275	0.020193
351	0.342105	0.186813	0.021834
352	0.34308	0.183516	0.015945
353	0.344055	0.237363	0.003806
354	0.345029	0.267033	0.002083
355	0.346004	0.285714	0.031611
356	0.346979	0.313187	0.013222
357	0.347953	0.263736	0.009334
358	0.348928	0.242857	0.00689
359	0.349903	0.283516	0.002363
360	0.350877	0.291209	0.004248
361	0.351852	0.334066	0.007891
362	0.352827	0.332967	0.00753
363	0.353801	0.32967	0.007169
364	0.354776	0.308791	0.010975
365	0.35575	0.347253	0.020635
366	0.356725	0.317582	0.006413
367	0.3577	0.4	0.013024
368	0.358674	0.324176	0.022032
369	0.359649	0.384615	0.017505
370	0.360624	0.376923	0.027561
371	0.361598	0.406593	0.004283
372	0.362573	0.376923	0.031006
373	0.363548	0.459341	0.026478
374	0.364522	0.414286	0.003201
375	0.365497	0.432967	0.017993
376	0.366472	0.401099	0.000396
377	0.367446	0.459341	0.029202
378	0.368421	0.398901	0.010091
379	0.369396	0.483516	0.007647
380	0.37037	0.385714	0.019797
381	0.371345	0.465934	0.020158
382	0.37232	0.471429	0.000314
383	0.373294	0.448352	4.7e-05
384	0.374269	0.385714	0.001676
385	0.375244	0.446154	0.021601
386	0.376218	0.497802	0.000954
387	0.377193	0.49011	0.005656
388	0.378168	0.438462	0.016899
389	0.379142	0.514286	0.010545
390	0.380117	0.491209	0.019239
391	0.381092	0.523077	0.007484
392	0.382066	0.46044	0.009544
393	0.383041	0.49011	0.009905
394	0.384016	0.484615	0.023068
395	0.38499	0.487912	0.014793
396	0.385965	0.449451	0.007763
397	0.38694	0.476923	0.017598
398	0.387914	0.469231	0.000791
399	0.388889	0.468132	0.009986
400	0.389864	0.431868	0.022986
401	0.390838	0.428571	0.010126
402	0.391813	0.445055	0.025652
403	0.392788	0.448352	0.023987
404	0.393762	0.425275	0.009043
405	0.394737	0.421978	0.014234
406	0.395712	0.46044	0.006238
407	0.396686	0.452747	0.025372
408	0.397661	0.462637	0.011767
409	0.398635	0.474725	0.000989
410	0.39961	0.462637	0.023545
411	0.400585	0.468132	0.021101
412	0.401559	0.469231	0.018843
413	0.402534	0.479121	0.014129
414	0.403509	0.462637	0.028352
415	0.404483	0.468132	0.009509
416	0.405458	0.482418	0.023464
417	0.406433	0.485714	0.018564
418	0.407407	0.493407	0.008159
419	0.408382	0.501099	0.016131
420	0.409357	0.464835	0.025896
421	0.410331	0.479121	0.000826
422	0.411306	0.464835	0.017132
423	0.412281	0.437363	0.024895
424	0.413255	0.451648	0.022661
425	0.41423	0.481319	0.005633
426	0.415205	0.42967	0.025978
427	0.416179	0.437363	0.022172
428	0.417154	0.447253	0.007949
429	0.418129	0.441758	0.00419
430	0.419103	0.449451	0.023254
431	0.420078	0.468132	0.022218
432	0.421053	0.431868	0.001024
433	0.422027	0.424176	0.00483
434	0.423002	0.407692	0.024697
435	0.423977	0.41978	0.020775
436	0.424951	0.416484	0.019169
437	0.425926	0.443956	0.01172
438	0.426901	0.412088	0.011359
439	0.427875	0.428571	0.000582
440	0.42885	0.394505	0.014362
441	0.429825	0.410989	0.020694
442	0.430799	0.394505	0.012
443	0.431774	0.404396	0.015445
444	0.432749	0.401099	0.017889
445	0.433723	0.408791	0.01825
446	0.434698	0.387912	0.008194
447	0.435673	0.389011	0.004388
448	0.436647	0.379121	0.001501
449	0.437622	0.373626	0.009276
450	0.438596	0.383516	0.01797
451	0.439571	0.395604	0.000419
452	0.440546	0.385714	0.018808
453	0.44152	0.36044	0.018447
454	0.442495	0.348352	0.018087
455	0.44347	0.362637	0.015608
456	0.444444	0.363736	0.013198
457	0.445419	0.375824	0.004504
458	0.446394	0.37033	0.00831
459	0.447368	0.362637	0.012884
460	0.448343	0.357143	0.015922
461	0.449318	0.347253	0.005144
462	0.450292	0.352747	0.005633
463	0.451267	0.347253	0.002339
464	0.452242	0.363736	0.014479
465	0.453216	0.364835	0.005784
466	0.454191	0.361538	0.019576
467	0.455166	0.334066	0.005063
468	0.45614	0.348352	0.001548
469	0.457115	0.347253	0.004341
470	0.45809	0.359341	0.014397
471	0.459064	0.349451	0.001536
472	0.460039	0.352747	0.013408
473	0.461014	0.336264	0.000815
474	0.461988	0.324176	0.010871
475	0.462963	0.320879	0.00824
476	0.463938	0.315385	0.001816
477	0.464912	0.325275	0.013128
478	0.465887	0.315385	0.013489
479	0.466862	0.294505	0.000733
480	0.467836	0.28022	0.010789
481	0.468811	0.281319	0.016655
482	0.469786	0.26044	0.000349
483	0.47076	0.259341	0.00071
484	0.471735	0.253846	0.001013
485	0.47271	0.250549	0.011848
486	0.473684	0.227473	0.003876
487	0.474659	0.210989	0.016597
488	0.475634	0.198901	0.012931
489	0.476608	0.189011	0.009125
490	0.477583	0.183516	0.007181
491	0.478558	0.173626	0.054737
492	0.479532	0.168132	0.003957
493	0.480507	0.162637	0.004015
494	0.481481	0.161538	0.011988
495	0.482456	0.156044	0.159544
496	0.483431	0.152747	0.115433
497	0.484405	0.153846	0.048405
498	0.48538	0.154945	0.139711
499	0.486355	0.145055	0.101851
500	0.487329	0.13956	0.261906
501	0.488304	0.134066	0.140712
502	0.489279	0.13956	0.184101
503	0.490253	0.140659	0.221241
504	0.491228	0.13956	0.237547
505	0.492203	0.12967	0.245519
506	0.493177	0.115385	0.230575
507	0.494152	0.103297	0.238547
508	0.495127	0.095604	0.24652
509	0.496101	0.076923	0.266993
510	0.497076	0.071429	0.352048
511	0.498051	0.065934	0.237104
512	0.499025	0.062637	0.311743
	0.25	0.705692	0.0204658

## Sheet: 10bit
Voltage source	Conventional	Previous	Proposed
1	0.000487805	0	0.000154
2	0.00097561	0.047594	0.0008
3	0.00146341	0.055615	0.000604
4	0.00195122	0.067914	4.2e-05
5	0.00243902	0.072727	0.000337
6	0.00292683	0.075401	0.000716
7	0.00341463	0.079144	7e-05
8	0.00390244	0.082888	0.000449
9	0.00439024	0.100535	0.001221
10	0.00487805	0.114973	0.000842
11	0.00536585	0.116578	0.000562
12	0.00585366	0.124599	0.001109
13	0.00634146	0.126203	0.000295
14	0.00682927	0.127807	0.001375
15	0.00731707	0.142246	0.001053
16	0.00780488	0.14492	0.001432
17	0.00829268	0.150802	0.000238
18	0.00878049	0.155615	0.000884
19	0.00926829	0.166845	0.00052
20	0.0097561	0.168449	0.000899
21	0.0102439	0.183957	0.001796
22	0.0107317	0.190909	0.001657
23	0.0112195	0.202139	0.001038
24	0.0117073	0.206952	0.000365
25	0.0121951	0.213904	0.00028
26	0.0126829	0.228342	0.000926
27	0.0131707	0.233155	0.002527
28	0.0136585	0.241176	0.001881
29	0.0141463	0.250267	0.000211
30	0.0146341	0.257219	0.002484
31	0.015122	0.268449	0.002105
32	0.0156098	0.273262	0.002372
33	0.0160976	0.278075	0.001727
34	0.0165854	0.287166	0.001081
35	0.0170732	0.282353	0.001614
36	0.017561	0.293583	0.001235
37	0.0180488	0.304813	0.002218
38	0.0185366	0.304278	0.000548
39	0.0190244	0.317647	0.002976
40	0.0195122	0.324599	0.002792
41	0.02	0.327273	0.003438
42	0.0204878	0.337433	0.002064
43	0.0209756	0.337968	0.002443
44	0.0214634	0.359893	0.001797
45	0.0219512	0.365775	0.002947
46	0.022439	0.374866	0.002555
47	0.0229268	0.375401	0.001164
48	0.0234146	0.384492	0.001264
49	0.0239024	0.392513	0.001431
50	0.0243902	0.405882	0.003101
51	0.024878	0.423529	0.001376
52	0.0253659	0.430481	0.002343
53	0.0258537	0.441711	8.5e-05
54	0.0263415	0.452941	0.00261
55	0.0268293	0.460963	0.000182
56	0.0273171	0.463636	0.000827
57	0.0278049	0.475936	0.004547
58	0.0282927	0.489305	0.003143
59	0.0287805	0.496257	0.002764
60	0.0292683	0.49893	0.002738
61	0.0297561	0.51016	0.003117
62	0.0302439	0.519251	0.001447
63	0.0307317	0.527273	0.002273
64	0.0312195	0.529947	0.004968
65	0.0317073	0.541176	0.004633
66	0.0321951	0.550267	0.001136
67	0.0326829	0.558289	0.001782
68	0.0331707	0.571658	0.00372
69	0.0336585	0.576471	0.001024
70	0.0341463	0.584492	0.002694
71	0.0346341	0.586096	0.000266
72	0.035122	0.596257	0.004212
73	0.0356098	0.605348	0.001557
74	0.0360976	0.61123	0.002203
75	0.0365854	0.62246	0.002848
76	0.0370732	0.63369	0.003678
77	0.037561	0.639572	0.002008
78	0.0380488	0.651872	0.00376
79	0.0385366	0.652406	0.000717
80	0.0390244	0.660428	7.1e-05
81	0.0395122	0.66631	0.003648
82	0.04	0.675401	0.005952
83	0.0404878	0.68984	0.004939
84	0.0409756	0.688235	0.002612
85	0.0414634	0.706952	0.004015
86	0.0419512	0.711765	0.005852
87	0.042439	0.717647	0.003749
88	0.0429268	0.723529	0.002078
89	0.0434146	0.727273	0.005531
90	0.0439024	0.74385	0.000237
91	0.0443902	0.757219	0.006289
92	0.044878	0.76738	0.002553
93	0.0453659	0.770053	0.004223
94	0.0458537	0.783422	0.006401
95	0.0463415	0.791444	0.001658
96	0.0468293	0.797326	0.004086
97	0.0473171	0.805348	0.00344
98	0.0478049	0.81123	0.005402
99	0.0482927	0.82139	0.002149
100	0.0487805	0.828342	0.000546
101	0.0492683	0.840642	0.001882
102	0.0497561	0.852941	0.002261
103	0.0502439	0.860963	0.006738
104	0.0507317	0.871123	0.002104
105	0.0512195	0.884492	0.000324
106	0.0517073	0.888235	0.005444
107	0.0521951	0.895187	0.007115
108	0.0526829	0.908556	0.001461
109	0.0531707	0.920856	0.004914
110	0.0536585	0.929947	0.001195
111	0.0541463	0.942246	0.005599
112	0.0546341	0.949198	0.007075
113	0.055122	0.95615	0.007914
114	0.0556098	0.960963	0.000661
115	0.0560976	0.966845	0.006132
116	0.0565854	0.985561	0.001419
117	0.0570732	0.982888	0.006921
118	0.057561	1.0016	0.004226
119	0.0580488	1.00428	0.000518
120	0.0585366	1.01872	0.00191
121	0.0590244	1.02567	0.001265
122	0.0595122	1.03155	0.001644
123	0.06	1.04492	0.005149
124	0.0604878	1.05508	0.00477
125	0.0609756	1.06524	0.00483
126	0.0614634	1.0754	0.006233
127	0.0619512	1.08128	0.000465
128	0.062439	1.09679	0.004942
129	0.0629268	1.10054	0.005321
130	0.0634146	1.12139	0.003651
131	0.0639024	1.12941	0.004167
132	0.0643902	1.13423	0.006458
133	0.064878	1.14652	0.006837
134	0.0653659	1.15454	0.002005
135	0.0658537	1.16471	0.00657
136	0.0663415	1.16631	0.0049
137	0.0668293	1.17647	0.002917
138	0.0673171	1.18235	0.000535
139	0.0678049	1.18823	0.002963
140	0.0682927	1.19305	0.007441
141	0.0687805	1.19786	0.003451
142	0.0692683	1.20802	0.001023
143	0.0697561	1.21925	0.007553
144	0.0702439	1.22192	0.004363
145	0.0707317	1.23529	0.005009
146	0.0712195	1.23583	0.003567
147	0.0717073	1.25989	0.00702
148	0.0721951	1.26257	0.008423
149	0.0726829	1.277	0.006567
150	0.0731707	1.2893	0.003114
151	0.0736585	1.29305	0.007511
152	0.0741463	1.30535	0.006865
153	0.0746341	1.31765	0.000952
154	0.075122	1.32139	0.007623
155	0.0756098	1.32941	0.005317
156	0.0760976	1.33529	0.008012
157	0.0765854	1.34866	0.003637
158	0.0770732	1.35562	0.000943
159	0.077561	1.36364	0.002346
160	0.0780488	1.37807	0.000349
161	0.0785366	1.38289	0.005093
162	0.0790244	1.39198	0.006557
163	0.0795122	1.39893	0.007408
164	0.08	1.41016	0.001167
165	0.0804878	1.41925	0.003595
166	0.0809756	1.43797	0.003974
167	0.0814634	1.4492	0.004868
168	0.0819512	1.46791	0.006781
169	0.082439	1.47487	0.010234
170	0.0829268	1.47861	0.000367
171	0.0834146	1.48235	0.004845
172	0.0839024	1.51604	0.008297
173	0.0843902	1.523	0.006693
174	0.084878	1.53102	0.003932
175	0.0853659	1.5369	0.005935
176	0.0858537	1.55348	0.005715
177	0.0863415	1.56364	0.000971
178	0.0868293	1.56203	0.007497
179	0.0873171	1.57968	0.008901
180	0.0878049	1.59091	0.006089
181	0.0882927	1.60428	0.00571
182	0.0887805	1.60802	0.000817
183	0.0892683	1.61818	0.008368
184	0.0897561	1.62299	0.008747
185	0.0902439	1.63102	0.006052
186	0.0907317	1.63904	0.009963
187	0.0912195	1.64492	0.00651
188	0.0917073	1.65294	0.001008
189	0.0921951	1.67166	0.003469
190	0.0926829	1.68075	0.009471
191	0.0931707	1.69626	0.007043
192	0.0936585	1.70214	0.004615
193	0.0941463	1.70909	0.009359
194	0.0946341	1.71925	0.006389
195	0.095122	1.72406	0.003478
196	0.0956098	1.73743	0.004073
197	0.0960976	1.75722	0.011942
198	0.0965854	1.76096	0.010538
199	0.0970732	1.76471	0.011184
200	0.097561	1.78235	0.002608
201	0.0980488	1.79358	0.007352
202	0.0985366	1.78556	0.003899
203	0.0990244	1.79893	0.007618
204	0.0995122	1.7984	6.7e-05
205	0.1	1.80428	0.008508
206	0.100488	1.80802	0.004789
207	0.100976	1.81711	0.002004
208	0.101463	1.82941	0.006571
209	0.101951	1.83316	0.011492
210	0.102439	1.84973	0.011113
211	0.102927	1.84813	0.003562
212	0.103415	1.85615	0.005232
213	0.103902	1.86417	0.005393
214	0.10439	1.88289	0.006796
215	0.104878	1.89091	0.013317
216	0.105366	1.89893	0.011913
217	0.105854	1.89626	0.00846
218	0.106341	1.89893	0.010131
219	0.106829	1.9262	0.001519
220	0.107317	1.89893	0.00907
221	0.107805	1.88984	0.001252
222	0.108293	1.92032	0.009828
223	0.10878	1.9508	0.014305
224	0.109268	1.95027	0.014004
225	0.109756	1.93583	0.008502
226	0.110244	1.93529	7.3e-05
227	0.110732	1.93476	0.011723
228	0.11122	1.94492	0.009028
229	0.111707	1.92941	0.012481
230	0.112195	1.97594	0.012755
231	0.112683	1.96257	0.008278
232	0.113171	1.96203	0.003372
233	0.113659	1.96043	0.007849
234	0.114146	1.95882	0.013288
235	0.114634	1.97112	0.004713
236	0.115122	1.99733	0.004334
237	0.11561	2.00749	0.003955
238	0.116098	2.01765	0.000502
239	0.116585	2.0139	0.005
240	0.117073	2.01658	0.006403
241	0.117561	2.01497	0.011905
242	0.118049	2.03048	0.007183
243	0.118537	2.03529	0.008853
244	0.119024	2.04439	0.000277
245	0.119512	2.03423	0.008298
246	0.12	2.04759	0.011751
247	0.120488	2.05668	0.013155
248	0.120976	2.05615	0.015155
249	0.121463	2.0631	0.009653
250	0.121951	2.05936	0.001077
251	0.122439	2.05561	0.0034
252	0.122927	2.07112	0.015049
253	0.123415	2.06738	0.014285
254	0.123902	2.05829	0.007758
255	0.12439	2.07594	0.008404
256	0.124878	2.09893	0.000853
257	0.125366	2.11123	0.009772
258	0.125854	2.09251	0.013225
259	0.126341	2.07594	0.016109
260	0.126829	2.07647	0.016755
261	0.127317	2.11337	0.012278
262	0.127805	2.1107	0.003702
263	0.128293	2.10695	0.006397
264	0.12878	2.13743	0.004993
265	0.129268	2.15508	0.005632
266	0.129756	2.13743	0.011134
267	0.130244	2.14439	0.014586
268	0.130732	2.12781	0.010649
269	0.13122	2.13904	0.015393
270	0.131707	2.14492	0.011941
271	0.132195	2.14973	0.011562
272	0.132683	2.1631	8.8e-05
273	0.133171	2.17112	0.002607
274	0.133659	2.18342	0.00392
275	0.134146	2.16898	0.007372
276	0.134634	2.1738	0.012874
277	0.135122	2.16364	0.015302
278	0.13561	2.1738	0.016081
279	0.136098	2.17968	0.013653
280	0.136585	2.19305	0.012249
281	0.137073	2.17754	0.010846
282	0.137561	2.1984	0.006368
283	0.138049	2.18075	0.001891
284	0.138537	2.21016	0.004636
285	0.139024	2.19893	0.010137
286	0.139512	2.24011	0.012566
287	0.14	2.21604	0.015744
288	0.140488	2.22406	0.012291
289	0.140976	2.22032	0.001407
290	0.141463	2.22513	0.000263
291	0.141951	2.26203	0.004215
292	0.142439	2.23155	0.007667
293	0.142927	2.23743	0.014194
294	0.143415	2.23369	0.01514
295	0.143902	2.2492	0.010663
296	0.14439	2.22513	0.008235
297	0.144878	2.24064	0.000341
298	0.145366	2.27112	0.007892
299	0.145854	2.25775	0.017492
300	0.146341	2.2615	0.010817
301	0.146829	2.24064	0.003906
302	0.147317	2.22941	0.007359
303	0.147805	2.23529	0.012861
304	0.148293	2.27326	0.015289
305	0.14878	2.25562	0.011996
306	0.149268	2.28717	0.014691
307	0.149756	2.29947	0.012263
308	0.150244	2.27861	0.007786
309	0.150732	2.31765	0.003308
310	0.15122	2.26471	0.00088
311	0.151707	2.30802	0.005646
312	0.152195	2.33422	0.000122
313	0.152683	2.3016	0.003331
314	0.153171	2.32674	0.00166
315	0.153659	2.31979	0.016384
316	0.154146	2.28503	0.003443
317	0.154634	2.34438	0.006896
318	0.155122	2.3246	0.009324
319	0.15561	2.2877	0.011752
320	0.156098	2.27754	0.015205
321	0.156585	2.28663	0.016179
322	0.157073	2.29572	0.011701
323	0.157561	2.29305	0.007224
324	0.158049	2.26364	0.001722
325	0.158537	2.29412	0.01505
326	0.159024	2.2861	0.012356
327	0.159512	2.25882	0.008782
328	0.16	2.30107	0.013526
329	0.160488	2.24706	0.002901
330	0.160976	2.28396	0.007724
331	0.161463	2.26631	0.001955
332	0.161951	2.25294	0.018157
333	0.162439	2.29412	0.011935
334	0.162927	2.28289	0.017437
335	0.163415	2.25562	0.012922
336	0.163902	2.3139	0.001273
337	0.16439	2.30267	0.000131
338	0.164878	2.27647	0.007682
339	0.165366	2.27273	0.015233
340	0.165854	2.27433	0.015126
341	0.166341	2.32086	0.002452
342	0.166829	2.2754	0.004075
343	0.167317	2.27166	0.006503
344	0.167805	2.25508	0.017128
345	0.168293	2.25134	0.004009
346	0.16878	2.31176	0.008753
347	0.169268	2.29519	0.003921
348	0.169756	2.29144	0.009423
349	0.170244	2.27059	0.017862
350	0.170732	2.24866	0.009287
351	0.17122	2.26631	0.007883
352	0.171707	2.22513	0.002742
353	0.172195	2.21604	0.01644
354	0.172683	2.25187	0.013918
355	0.173171	2.26952	0.014564
356	0.173659	2.30107	0.005988
357	0.174146	2.25454	0.002587
358	0.174634	2.25508	0.011163
359	0.175122	2.23957	0.009974
360	0.17561	2.25936	0.015743
361	0.176098	2.2631	0.005118
362	0.176585	2.25187	0.001408
363	0.177073	2.2738	0.00691
364	0.177561	2.23476	0.01935
365	0.178049	2.27166	0.011799
366	0.178537	2.23155	0.001174
367	0.179024	2.2492	0.006377
368	0.179512	2.22406	0.012904
369	0.18	2.22139	0.01943
370	0.180488	2.28503	0.014002
371	0.180976	2.24385	0.009525
372	0.181463	2.24546	0.000949
373	0.181951	2.24813	0.003528
374	0.182439	2.21444	0.013128
375	0.182927	2.2492	0.015181
376	0.183415	2.21658	0.008655
377	0.183902	2.20428	0.003153
378	0.18439	2.18984	0.002349
379	0.184878	2.22353	0.004777
380	0.185366	2.20695	0.011304
381	0.185854	2.19037	0.015781
382	0.186341	2.20588	0.018676
383	0.186829	2.13369	0.01215
384	0.187317	2.16524	0.003574
385	0.187805	2.17968	0.012174
386	0.188293	2.19733	0.009479
387	0.18878	2.15829	0.01703
388	0.189268	2.16738	0.015378
389	0.189756	2.20535	0.001679
390	0.190244	2.14813	0.001774
391	0.190732	2.13369	0.005019
392	0.19122	2.14385	0.001507
393	0.191707	2.18503	0.014181
394	0.192195	2.15562	0.015585
395	0.192683	2.14973	0.009816
396	0.193171	2.14706	0.014293
397	0.193659	2.17754	0.018114
398	0.194146	2.13422	0.012613
399	0.194634	2.12193	0.005061
400	0.195122	2.1631	0.010686
401	0.19561	2.10481	0.004918
402	0.196098	2.12032	0.012469
403	0.196585	2.14439	0.018995
404	0.197073	2.14385	0.014437
405	0.197561	2.07914	0.007911
406	0.198049	2.12995	0.008862
407	0.198537	2.09412	0.005142
408	0.199024	2.09893	0.013718
409	0.199512	2.06524	0.01869
410	0.2	2.10963	0.012163
411	0.200488	2.08556	0.005637
412	0.200976	2.10321	0.001914
413	0.201463	2.12193	0.008441
414	0.201951	2.08503	0.014967
415	0.202439	2.06631	0.009244
416	0.202927	2.07326	0.015012
417	0.203415	2.05561	0.008486
418	0.203902	2.07112	0.002984
419	0.20439	2.07059	0.016949
420	0.204878	2.07754	0.003922
421	0.205366	2.12513	0.011473
422	0.205854	2.1	0.017999
423	0.206341	2.07914	0.016458
424	0.206829	2.04332	0.001339
425	0.207317	2.03102	0.006841
426	0.207805	2.06471	0.000977
427	0.208293	2.05455	0.018869
428	0.20878	2.06898	0.009003
429	0.209268	2.03636	0.015529
430	0.209756	2.0615	0.008682
431	0.210244	2.00535	0.0165
432	0.210732	2.04866	0.009973
433	0.21122	2.00642	0.004471
434	0.211707	1.99733	6e-06
435	0.212195	2.0385	0.006532
436	0.212683	1.97273	0.012034
437	0.213171	2.03315	0.018561
438	0.213659	2.00374	0.015896
439	0.214146	1.98503	0.002925
440	0.214634	1.96524	0.005917
441	0.215122	1.93904	0.000415
442	0.21561	1.9631	0.004062
443	0.216098	1.94973	0.017075
444	0.216585	1.94064	0.010968
445	0.217073	2.03636	0.01647
446	0.217561	1.98235	0.017987
447	0.218049	1.98396	0.00019
448	0.218537	1.93957	0.011082
449	0.219024	1.92086	0.006605
450	0.219512	1.94599	0.002127
451	0.22	1.93048	0.011571
452	0.220488	1.96096	0.004778
453	0.220976	1.91444	0.009255
454	0.221463	1.94492	0.014757
455	0.221951	1.93476	0.01821
456	0.222439	1.91925	0.015222
457	0.222927	1.92727	0.010745
458	0.223415	1.92674	0.006268
459	0.223902	1.90802	0.00179
460	0.22439	1.91711	0.011908
461	0.224878	1.93048	0.018435
462	0.225366	1.90214	0.007543
463	0.225854	1.87701	0.010996
464	0.226341	1.90535	0.015473
465	0.226829	1.8631	0.010729
466	0.227317	1.88396	0.011108
467	0.227805	1.85989	0.009004
468	0.228293	1.83583	0.003503
469	0.22878	1.84171	5e-05
470	0.229268	1.84438	0.015698
471	0.229756	1.87594	0.012612
472	0.230244	1.83583	0.012233
473	0.230732	1.79251	0.010829
474	0.23122	1.82727	0.01045
475	0.231707	1.77968	0.013145
476	0.232195	1.82406	0.011741
477	0.232683	1.74225	9.2e-05
478	0.233171	1.7738	0.008484
479	0.233659	1.82353	0.006814
480	0.234146	1.75882	0.010266
481	0.234634	1.78824	0.006773
482	0.235122	1.75455	0.006394
483	0.23561	1.74225	0.000892
484	0.236098	1.73102	0.000512
485	0.236585	1.68984	0.00294
486	0.237073	1.75134	0.014589
487	0.237561	1.7754	0.007796
488	0.238049	1.78342	0.018421
489	0.238537	1.69198	0.009888
490	0.239024	1.66471	0.012007
491	0.239512	1.65241	0.006057
492	0.24	1.66257	0.015839
493	0.240488	1.76578	0.016569
494	0.240976	1.68931	0.003277
495	0.241463	1.69305	0.013762
496	0.241951	1.72353	0.007236
497	0.242439	1.65989	0.006463
498	0.242927	1.74385	0.008527
499	0.243415	1.70909	0.000976
500	0.243902	1.7107	0.003502
501	0.24439	1.72941	0.010464
502	0.244878	1.65615	0.010407
503	0.245366	1.69947	0.01386
504	0.245854	1.62406	0.019362
505	0.246341	1.73155	0.01612
506	0.246829	1.74385	0.011643
507	0.247317	1.67807	0.006154
508	0.247805	1.68182	0.004737
509	0.248293	1.63529	0.00026
510	0.24878	1.61765	0.019348
511	0.249268	1.66417	0.006646
512	0.249756	1.6508	0.011123
513	0.250244	1.67701	0.016625
514	0.250732	1.6508	0.018857
515	0.25122	1.63423	0.013355
516	0.251707	1.59198	0.008878
517	0.252195	1.62353	0.005425
518	0.252683	1.57807	0.015446
519	0.253171	1.56898	0.002505
520	0.253659	1.6262	0.006983
521	0.254146	1.60856	0.01146
522	0.254634	1.63155	0.015937
523	0.255122	1.54225	0.002997
524	0.25561	1.5738	0.016092
525	0.256098	1.52513	0.011614
526	0.256585	1.52674	0.007137
527	0.257073	1.53904	0.00266
528	0.257561	1.52353	0.001818
529	0.258049	1.57005	0.006295
530	0.258537	1.54278	0.010772
531	0.259024	1.48449	0.001144
532	0.259512	1.49465	0.017678
533	0.26	1.51444	0.016779
534	0.260488	1.48289	0.011264
535	0.260976	1.48342	0.009874
536	0.261463	1.56096	0.004372
537	0.261951	1.49091	0.000919
538	0.262439	1.43262	0.003558
539	0.262927	1.4631	0.008036
540	0.263415	1.48075	0.009004
541	0.263902	1.43423	0.014941
542	0.26439	1.41765	0.019418
543	0.264878	1.42353	0.01094
544	0.265366	1.38342	0.010955
545	0.265854	1.37005	0.011207
546	0.266341	1.42406	0.007754
547	0.266829	1.41176	0.015166
548	0.267317	1.40909	0.000176
549	0.267805	1.35294	0.005678
550	0.268293	1.36203	0.011361
551	0.26878	1.31444	0.011559
552	0.269268	1.31818	0.002407
553	0.269756	1.35401	0.007194
554	0.270244	1.35882	0.019067
555	0.270732	1.31658	0.014099
556	0.27122	1.29144	0.010112
557	0.271707	1.29519	0.006659
558	0.272195	1.27754	0.003207
559	0.272683	1.27166	0.00332
560	0.273171	1.31497	0.006773
561	0.273659	1.27059	0.007193
562	0.274146	1.27968	0.006814
563	0.274634	1.28235	0.002336
564	0.275122	1.24759	0.002141
565	0.27561	1.28877	0.018913
566	0.276098	1.19412	0.018617
567	0.276585	1.23422	0.015165
568	0.277073	1.22192	0.010687
569	0.277561	1.20321	0.007235
570	0.278049	1.223	0.006856
571	0.278537	1.2246	0.004428
572	0.279024	1.21658	0.018393
573	0.279512	1.19893	0.011866
574	0.28	1.14385	0.008414
575	0.280488	1.18503	0.003236
576	0.280976	1.1492	0.00259
577	0.281463	1.20642	0.001945
578	0.281951	1.21872	0.003348
579	0.282439	1.18503	0.011924
580	0.282927	1.19305	8e-06
581	0.283415	1.13155	0.000387
582	0.283902	1.16845	0.011012
583	0.28439	1.12513	0.010366
584	0.284878	1.14706	0.010745
585	0.285366	1.14118	0.011124
586	0.285854	1.07112	0.015601
587	0.286341	1.14759	0.010659
588	0.286829	1.11497	0.016428
589	0.287317	1.12086	0.01195
590	0.287805	1.13102	0.016694
591	0.288293	1.08021	0.015291
592	0.28878	1.12139	0.000457
593	0.289268	1.02032	0.010434
594	0.289756	1.06364	0.017228
595	0.290244	1.00856	0.003529
596	0.290732	1.03797	0.000948
597	0.29122	1.00749	0.005426
598	0.291707	0.971658	0.003417
599	0.292195	1.00963	0.013356
600	0.292683	0.970588	0.017833
601	0.293171	0.959358	0.016624
602	0.293659	1.0369	0.013468
603	0.294146	0.976471	0.009718
604	0.294634	0.925668	0.005241
605	0.295122	0.943316	0.000261
606	0.29561	0.937433	0.003714
607	0.296098	0.981818	0.009215
608	0.296585	0.947059	0.012668
609	0.297073	1.00214	0.01817
610	0.297561	0.89893	0.017312
611	0.298049	0.961497	0.017903
612	0.298537	0.941711	0.007332
613	0.299024	0.904813	0.00388
614	0.299512	0.893583	0.012722
615	0.3	0.917647	0.002001
616	0.300488	0.892513	0.004792
617	0.300976	0.880214	0.00071
618	0.301463	0.904278	0.015433
619	0.301951	0.91016	0.017999
620	0.302439	0.895722	0.012497
621	0.302927	0.884492	0.006995
622	0.303415	0.889305	0.016949
623	0.303902	0.834225	9e-05
624	0.30439	0.879679	0.005412
625	0.304878	0.864171	0.010914
626	0.305366	0.828342	0.00617
627	0.305854	0.818182	0.019066
628	0.306341	0.78984	0.011515
629	0.306829	0.823529	0.002939
630	0.307317	0.779144	0.003588
631	0.307805	0.82246	0.009089
632	0.308293	0.798396	0.015616
633	0.30878	0.820321	0.016792
634	0.309268	0.780214	0.009241
635	0.309756	0.742246	0.01296
636	0.310244	0.74385	0.001763
637	0.310732	0.714439	0.010339
638	0.31122	0.704278	0.016865
639	0.311707	0.694118	0.015543
640	0.312195	0.679679	0.006967
641	0.312683	0.728342	0.008637
642	0.313171	0.688235	0.010184
643	0.313659	0.670588	0.016711
644	0.314146	0.682888	0.016722
645	0.314634	0.625668	0.010195
646	0.315122	0.661497	0.002644
647	0.31561	0.651337	0.006363
648	0.316098	0.597326	0.003935
649	0.316585	0.648128	0.012837
650	0.317073	0.599465	0.019571
651	0.317561	0.610695	0.015644
652	0.318049	0.586631	0.019097
653	0.318537	0.581818	0.007163
654	0.319024	0.553476	0.000388
655	0.319512	0.520856	0.00589
656	0.32	0.580214	0.003195
657	0.320488	0.562567	0.016894
658	0.320976	0.555615	0.015514
659	0.321463	0.520856	0.008988
660	0.321951	0.56631	0.001437
661	0.322439	0.53369	0.006114
662	0.322927	0.571658	0.016739
663	0.323415	0.51016	0.018742
664	0.323902	0.502139	0.014265
665	0.32439	0.486631	0.009788
666	0.324878	0.541711	0.002237
667	0.325366	0.520856	0.005314
668	0.325854	0.519251	0.012865
669	0.326341	0.51123	0.018367
670	0.326829	0.487166	0.013016
671	0.327317	0.496257	0.003416
672	0.327805	0.476471	0.009258
673	0.328293	0.478075	0.017834
674	0.32878	0.493583	0.014574
675	0.329268	0.457754	0.008047
676	0.329756	0.493583	0.001553
677	0.330244	0.459893	0.009104
678	0.330732	0.448663	0.018181
679	0.33122	0.436364	0.011654
680	0.331707	0.436898	0.002054
681	0.332195	0.44492	0.01062
682	0.332683	0.445455	0.00895
683	0.333171	0.429947	0.011163
684	0.333659	0.417647	0.005661
685	0.334146	0.407487	0.00189
686	0.334634	0.414439	0.007392
687	0.335122	0.405348	0.008795
688	0.33561	0.354545	0.017371
689	0.336098	0.385027	0.011963
690	0.336585	0.378075	0.001338
691	0.337073	0.391444	0.000959
692	0.337561	0.345989	0.008641
693	0.338049	0.380749	0.014545
694	0.338537	0.358824	0.008019
695	0.339024	0.328342	0.007729
696	0.339512	0.305348	0.002985
697	0.34	0.320856	0.016684
698	0.340488	0.341711	0.011626
699	0.340976	0.252406	0.009198
700	0.341463	0.266845	0.001647
701	0.341951	0.330481	0.011027
702	0.342439	0.282888	0.017282
703	0.342927	0.248128	0.009731
704	0.343415	0.260428	0.001155
705	0.343902	0.263102	0.000248
706	0.34439	0.231551	0.009848
707	0.344878	0.251337	0.016375
708	0.345366	0.261497	0.012959
709	0.345854	0.195722	0.016679
710	0.346341	0.270053	0.001118
711	0.346829	0.237433	0.000552
712	0.347317	0.158824	0.009048
713	0.347805	0.183957	0.017624
714	0.348293	0.141711	0.01288
715	0.34878	0.174332	0.009282
716	0.349268	0.148128	0.011977
717	0.349756	0.180749	0.002747
718	0.350244	0.141711	0.011322
719	0.350732	0.100535	0.016987
720	0.35122	0.154545	0.009436
721	0.351707	0.065241	0.00291
722	0.352195	0.126738	0.002592
723	0.352683	0.096257	0.008094
724	0.353171	0.03262	0.011547
725	0.353659	0.018182	0.015738
726	0.354146	0.003743	0.007182
727	0.354634	0.062032	0.01498
728	0.355122	0.061497	0.014601
729	0.35561	0.033155	0.010124
730	0.356098	0.026203	0.011794
731	0.356585	0.024599	0.001169
732	0.357073	0.01016	0.004333
733	0.357561	0.034225	0.00881
734	0.358049	0.024064	0.012263
735	0.358537	0.128342	0.013666
736	0.359024	0.01123	0.010972
737	0.359512	0.062032	0.017338
738	0.36	0.057219	0.01491
739	0.360488	0.057754	0.010432
740	0.360976	0.092513	0.008004
741	0.361463	0.079144	0.00467
742	0.361951	0.004813	0.011196
743	0.362439	0.099465	0.015064
744	0.362927	0.090374	0.008538
745	0.363415	0.08984	3.8e-05
746	0.363902	0.126738	0.008614
747	0.36439	0.142246	0.016165
748	0.364878	0.114973	0.01112
749	0.365366	0.150802	0.005618
750	0.365854	0.193048	0.002165
751	0.366341	0.17754	0.002312
752	0.366829	0.129947	0.000642
753	0.367317	0.17754	0.01434
754	0.367805	0.174866	0.014994
755	0.368293	0.204278	0.003344
756	0.36878	0.195187	0.000108
757	0.369268	0.17861	0.003561
758	0.369756	0.245455	0.008038
759	0.370244	0.220321	0.010467
760	0.370732	0.257219	0.014944
761	0.37122	0.225668	0.013366
762	0.371707	0.216578	0.008888
763	0.372195	0.258824	0.001337
764	0.372683	0.246524	0.002116
765	0.373171	0.237433	0.002495
766	0.373659	0.236898	0.005947
767	0.374146	0.28877	0.007351
768	0.374634	0.281818	0.011828
769	0.375122	0.240642	0.009133
770	0.37561	0.268984	0.014053
771	0.376098	0.297326	0.0106
772	0.376585	0.320321	2.4e-05
773	0.377073	0.319786	0.001646
774	0.377561	0.370588	0.004881
775	0.378049	0.346524	0.006284
776	0.378537	0.329947	0.009737
777	0.379024	0.300535	0.014474
778	0.379512	0.364171	0.009997
779	0.38	0.376471	0.007569
780	0.380488	0.387701	0.005105
781	0.380976	0.410695	0.008558
782	0.381463	0.396257	0.007912
783	0.381951	0.346524	0.010341
784	0.382439	0.382353	0.013793
785	0.382927	0.409626	0.010418
786	0.383415	0.406952	0.002867
787	0.383902	0.424599	0.001611
788	0.38439	0.434759	0.012236
789	0.384878	0.431016	0.014025
790	0.385366	0.426203	0.002375
791	0.385854	0.42139	5.3e-05
792	0.386341	0.413369	0.008628
793	0.386829	0.427807	0.015155
794	0.387317	0.447594	0.010081
795	0.387805	0.428877	0.000481
796	0.388293	0.436898	0.007071
797	0.38878	0.464171	0.014622
798	0.389268	0.446524	0.00754
799	0.389756	0.452406	0.008186
800	0.390244	0.462567	0.003463
801	0.390732	0.456684	0.015113
802	0.39122	0.460428	0.009098
803	0.391707	0.451337	0.003576
804	0.392195	0.446524	0.003955
805	0.392683	0.449198	0.003309
806	0.393171	0.459358	0.003688
807	0.393659	0.474866	0.013288
808	0.394146	0.439037	0.008874
809	0.394634	0.456684	0.002347
810	0.395122	0.481818	0.013401
811	0.39561	0.431016	0.008761
812	0.396098	0.440107	0.003913
813	0.396585	0.458824	0.010439
814	0.397073	0.466845	0.00672
815	0.397561	0.477005	0.011344
816	0.398049	0.485027	0.001743
817	0.398537	0.469519	0.007857
818	0.399024	0.451872	0.012256
819	0.399512	0.450267	0.008803
820	0.4	0.451872	0.003871
821	0.400488	0.450267	0.002922
822	0.400976	0.459358	0.005653
823	0.401463	0.465241	0.010361
824	0.401951	0.444385	0.000264
825	0.402439	0.46631	0.007815
826	0.402927	0.466845	0.009218
827	0.403415	0.482353	0.011919
828	0.403902	0.473262	0.012565
829	0.40439	0.477005	0.003183
830	0.404878	0.458289	0.005611
831	0.405366	0.44492	0.003231
832	0.405854	0.468984	0.002271
833	0.406341	0.470588	0.006748
834	0.406829	0.462567	0.005168
835	0.407317	0.472727	0.007863
836	0.407805	0.468984	0.00441
837	0.408293	0.471658	6.7e-05
838	0.40878	0.439037	0.010824
839	0.409268	0.480214	0.011071
840	0.409756	0.493583	0.008017
841	0.410244	0.463102	0.005589
842	0.410732	0.490374	0.002987
843	0.41122	0.460963	0.008489
844	0.411707	0.495722	0.011942
845	0.412195	0.508021	0.006122
846	0.412683	0.491444	0.003478
847	0.413171	0.483422	0.003315
848	0.413659	0.45508	0.004985
849	0.414146	0.499465	0.003582
850	0.414634	0.49893	0.000129
851	0.415122	0.51016	0.006398
852	0.41561	0.527807	0.007801
853	0.416098	0.521925	0.002066
854	0.416585	0.532086	0.007534
855	0.417073	0.474866	0.010987
856	0.417561	0.513904	0.009317
857	0.418049	0.544385	0.008671
858	0.418537	0.533155	0.003927
859	0.419024	0.529412	0.009013
860	0.419512	0.524599	0.003661
861	0.42	0.517647	0.011212
862	0.420488	0.52139	0.005827
863	0.420976	0.517647	0.002374
864	0.421463	0.537433	0.009275
865	0.421951	0.522995	0.008629
866	0.422439	0.542781	0.002861
867	0.422927	0.518717	0.01008
868	0.423415	0.508556	0.003619
869	0.423902	0.55508	0.005224
870	0.42439	0.541711	0.001771
871	0.424878	0.543316	0.000367
872	0.425366	0.531016	0.003062
873	0.425854	0.55508	0.000391
874	0.426341	0.554545	0.007427
875	0.426829	0.564706	0.009097
876	0.427317	0.580214	0.009724
877	0.427805	0.572193	0.005266
878	0.428293	0.559893	0.006936
879	0.42878	0.568984	0.003689
880	0.429268	0.568449	0.003104
881	0.429756	0.581818	0.002725
882	0.430244	0.586631	0.003371
883	0.430732	0.595722	0.009303
884	0.43122	0.581283	0.003637
885	0.431707	0.559358	0.008381
886	0.432195	0.595187	0.004929
887	0.432683	0.60107	0.008648
888	0.433171	0.615508	0.006075
889	0.433659	0.575401	0.000718
890	0.434146	0.580214	0.003413
891	0.434634	0.594652	0.003034
892	0.435122	0.568449	0.002468
893	0.43561	0.582888	0.00797
894	0.436098	0.591979	0.008349
895	0.436585	0.591444	0.004592
896	0.437073	0.584492	0.005009
897	0.437561	0.549733	0.00076
898	0.438049	0.555615	0.00884
899	0.438537	0.565775	0.002051
900	0.439024	0.577005	0.001672
901	0.439512	0.566845	0.000269
902	0.44	0.565241	0.004209
903	0.440488	0.561497	0.003563
904	0.440976	0.555615	0.002917
905	0.441463	0.542246	0.008999
906	0.441951	0.559893	0.003497
907	0.442439	0.544385	4.4e-05
908	0.442927	0.547059	0.005458
909	0.443415	0.548663	0.003384
910	0.443902	0.545989	6.8e-05
911	0.44439	0.549733	0.001472
912	0.444878	0.548128	0.004297
913	0.445366	0.551872	0.007353
914	0.445854	0.528877	0.002514
915	0.446341	0.526203	0.004012
916	0.446829	0.514973	0.007904
917	0.447317	0.529412	0.003746
918	0.447805	0.509626	0.001051
919	0.448293	0.512299	0.004718
920	0.44878	0.512834	0.002289
921	0.449268	0.515508	0.00191
922	0.449756	0.492513	0.000507
923	0.450244	0.485561	0.002177
924	0.450732	0.481818	0.002823
925	0.45122	0.469519	0.006542
926	0.451707	0.467914	0.005107
927	0.452195	0.46631	0.007833
928	0.452683	0.486096	0.002791
929	0.453171	0.465241	0.004195
930	0.453659	0.468984	0.002525
931	0.454146	0.462032	0.00017
932	0.454634	0.460428	0.002258
933	0.455122	0.452406	0.003662
934	0.45561	0.45508	0.001082
935	0.456098	0.445989	0.000321
936	0.456585	0.449733	0.000324
937	0.457073	0.459893	0.004153
938	0.457561	0.451872	0.002483
939	0.458049	0.451337	0.000212
940	0.458537	0.452941	0.000858
941	0.459024	0.447059	0.005669
942	0.459512	0.43262	0.002974
943	0.46	0.442781	0.00177
944	0.460488	0.442246	0.004465
945	0.460976	0.435294	0.003061
946	0.461463	0.427273	0.001416
947	0.461951	0.434225	0.001279
948	0.462439	0.43262	0.002174
949	0.462927	0.392513	0.001545
950	0.463415	0.398396	0.006006
951	0.463902	0.405348	0.003311
952	0.46439	0.398396	0.005531
953	0.464878	0.385027	0.006118
954	0.465366	0.393048	0.006822
955	0.465854	0.390374	0.005419
956	0.466341	0.383422	0.00504
957	0.466829	0.37754	0.005686
958	0.467317	0.364171	0.003915
959	0.467805	0.370053	0.005952
960	0.468293	0.364171	0.005573
961	0.46878	0.366845	0.006219
962	0.469268	0.357754	0.005431
963	0.469756	0.363636	0.001711
964	0.470244	0.357754	0.006189
965	0.470732	0.35508	0.001445
966	0.47122	0.350267	0.002848
967	0.471707	0.35508	0.005994
968	0.472195	0.358824	0.003566
969	0.472683	0.350802	0.004212
970	0.473171	0.345989	0.000266
971	0.473659	0.339037	0.001405
972	0.474146	0.339572	0.005124
973	0.474634	0.330481	0.004476
974	0.475122	0.32139	0.000757
975	0.47561	0.322995	0.005234
976	0.476098	0.312834	0.005613
977	0.476585	0.305882	0.000869
978	0.477073	0.297861	0.002273
979	0.477561	0.28877	0.002652
980	0.478049	0.291444	0.002006
981	0.478537	0.286631	0.002738
982	0.479024	0.287166	0.000715
983	0.479512	0.269519	0.001094
984	0.48	0.267914	0.004675
985	0.480488	0.265241	0.000197
986	0.480976	0.264706	0.003917
987	0.481463	0.260963	0.000464
988	0.481951	0.252941	0.002134
989	0.482439	0.256684	0.000294
990	0.482927	0.248663	0.002401
991	0.483415	0.233155	0.001052
992	0.483902	0.240107	0.003692
993	0.48439	0.233155	0.003313
994	0.484878	0.230481	0.003959
995	0.485366	0.227807	0.002568
996	0.485854	0.218717	0.002947
997	0.486341	0.211765	0.002301
998	0.486829	0.201604	0.00268
999	0.487317	0.193583	0.002064
1000	0.487805	0.18877	0.003438
1001	0.488293	0.175401	0.002792
1002	0.48878	0.174866	9.8e-05
1003	0.489268	0.171123	0.000548
1004	0.489756	0.159893	0.003243
1005	0.490244	0.15508	0.003888
1006	0.490732	0.138503	0.003509
1007	0.49122	0.141176	0.000968
1008	0.491707	0.128877	0.000702
1009	0.492195	0.128342	0.001348
1010	0.492683	0.125668	0.003129
1011	0.493171	0.126203	0.002484
1012	0.493659	0.114973	0.001838
1013	0.494146	0.114439	0.000168
1014	0.494634	0.114973	0.000478
1015	0.495122	0.106952	0.000926
1016	0.49561	0.107487	0.000744
1017	0.496098	0.095187	0.000659
1018	0.496585	0.079679	0.002063
1019	0.497073	0.078075	0.004491
1020	0.497561	0.075401	0.034583
1021	0.498049	0.072727	0.073896
1022	0.498537	0.067914	0.077349
1023	0.499024	0.055615	0.09822
1024	0.499512	0.047594	0.104747
	0.25	1.08579	0.00740831

## Sheet: 11bit
Voltage source	Conventional	Previous	Proposed
1	0.000244021	0	0.000483
2	0.000488043	0.081158	0.001497
3	0.000732064	0.088536	0.000546
4	0.000976086	0.093076	0.000468
5	0.00122011	0.103859	0.001482
6	0.00146413	0.104427	0.000966
7	0.00170815	0.104427	0.000453
8	0.00195217	0.101589	6.3e-05
9	0.00219619	0.106129	0.000951
10	0.00244021	0.097049	0.000438
11	0.00268424	0.103859	7.8e-05
12	0.00292826	0.114075	0.000591
13	0.00317228	0.114075	0.000423
14	0.0034163	0.109535	0.001434
15	0.00366032	0.111237	0.000606
16	0.00390434	0.107264	0.000405
17	0.00414837	0.113507	0.000108
18	0.00439239	0.120885	0.000906
19	0.00463641	0.124291	0.002667
20	0.00488043	0.118048	0.001404
21	0.00512445	0.127128	0.000891
22	0.00536847	0.129966	0.001152
23	0.00561249	0.131101	0.000138
24	0.00585652	0.125426	0.002403
25	0.00610054	0.128263	0.00036
26	0.00634456	0.118048	0.002901
27	0.00658858	0.126561	0.000858
28	0.0068326	0.129398	0.001872
29	0.00707662	0.133939	0.001698
30	0.00732064	0.132236	0.003741
31	0.00756467	0.140749	0.00033
32	0.00780869	0.133939	0.001713
33	0.00805271	0.140182	0.002229
34	0.00829673	0.143587	0.002742
35	0.00854075	0.140749	0.003258
36	0.00878477	0.146992	0.002244
37	0.00902879	0.143019	0.00276
38	0.00927282	0.14983	0.001746
39	0.00951684	0.148127	0.003852
40	0.00976086	0.145289	0.000282
41	0.0100049	0.15891	0.002823
42	0.0102489	0.14756	0.003837
43	0.0104929	0.146992	0.00279
44	0.0107369	0.156073	0.002808
45	0.010981	0.152667	0.000765
46	0.011225	0.150397	0.003309
47	0.011469	0.139614	0.000264
48	0.011713	0.146992	0.00075
49	0.0119571	0.140749	0.00282
50	0.0122011	0.132804	0.004305
51	0.0124451	0.144722	0.005319
52	0.0126891	0.14756	0.001308
53	0.0129331	0.145857	0.00429
54	0.0131772	0.153802	0.003777
55	0.0134212	0.15437	0.00438
56	0.0136652	0.160613	0.005802
57	0.0139092	0.162316	0.005289
58	0.0141532	0.160613	0.000189
59	0.0143973	0.149262	0.004911
60	0.0146413	0.161748	0.002367
61	0.0148853	0.160045	0.00594
62	0.0151293	0.175936	0.000342
63	0.0153734	0.19353	0.002202
64	0.0156174	0.190692	0.002898
65	0.0158614	0.183314	0.003414
66	0.0161054	0.1958	0.00087
67	0.0163494	0.1958	0.004443
68	0.0165935	0.203746	0.004212
69	0.0168375	0.19126	0.003942
70	0.0170815	0.205448	0.005985
71	0.0173255	0.198638	0.001914
72	0.0175695	0.192963	0.00243
73	0.0178136	0.200908	0.000111
74	0.0180576	0.211124	0.006516
75	0.0183016	0.1958	0.005196
76	0.0185456	0.215096	0.00468
77	0.0187897	0.216799	0.00264
78	0.0190337	0.209421	0.000933
79	0.0192777	0.19807	0.003138
80	0.0195217	0.215664	0.002622
81	0.0197657	0.220772	0.005532
82	0.0200098	0.206583	0.002991
83	0.0202538	0.223042	0.00045
84	0.0204978	0.215664	0.002493
85	0.0207418	0.207719	0.003006
86	0.0209858	0.216232	0.001992
87	0.0212299	0.220204	0.000549
88	0.0214739	0.209421	0.006147
89	0.0217179	0.216232	0.00048
90	0.0219619	0.236095	0.002523
91	0.022206	0.227015	0.001509
92	0.02245	0.214529	0.006609
93	0.022694	0.218502	0.00816
94	0.022938	0.232123	0.003054
95	0.023182	0.233825	0.004074
96	0.0234261	0.257094	0.003558
97	0.0236701	0.26504	0.003045
98	0.0239141	0.272985	0.005586
99	0.0241581	0.267877	0.005073
100	0.0244021	0.278093	0.009141
101	0.0246462	0.26504	0.00207
102	0.0248902	0.275255	0.003528
103	0.0251342	0.282066	0.003099
104	0.0253782	0.270715	0.004026
105	0.0256223	0.278093	0.008097
106	0.0258663	0.30193	0.002997
107	0.0261103	0.280931	0.008214
108	0.0263543	0.297957	0.008082
109	0.0265983	0.321793	0.007716
110	0.0268424	0.286606	0.002118
111	0.0270864	0.301362	0.005688
112	0.0273304	0.315551	0.007731
113	0.0275744	0.326901	0.000603
114	0.0278184	0.323496	0.005703
115	0.0280625	0.332009	0.009066
116	0.0283065	0.34109	0.005205
117	0.0285505	0.337117	0.00498
118	0.0287945	0.336549	0.004704
119	0.0290386	0.339387	0.000636
120	0.0292826	0.34109	0.00879
121	0.0295266	0.345062	0.001392
122	0.0297706	0.357548	0.006762
123	0.0300146	0.342792	0.005751
124	0.0302587	0.355278	0.009321
125	0.0305027	0.363791	0.003918
126	0.0307467	0.359818	0.009519
127	0.0309907	0.365494	0.009003
128	0.0312347	0.353575	0.006795
129	0.0314788	0.336549	0.007974
130	0.0317228	0.335982	0.010515
131	0.0319668	0.333144	0.003753
132	0.0322108	0.348468	0.004269
133	0.0324549	0.35244	0.007443
134	0.0326989	0.363224	0.011409
135	0.0329429	0.381952	0.005811
136	0.0331869	0.362089	0.005901
137	0.0334309	0.365494	0.011427
138	0.033675	0.364926	0.006399
139	0.033919	0.375142	0.004356
140	0.034163	0.376844	0.009912
141	0.034407	0.377412	0.009441
142	0.034651	0.385925	0.007398
143	0.0348951	0.378547	0.008412
144	0.0351391	0.383655	0.010953
145	0.0353831	0.398411	0.011967
146	0.0356271	0.385925	0.011451
147	0.0358712	0.397843	0.004824
148	0.0361152	0.42622	0.001803
149	0.0363592	0.409762	0.000789
150	0.0366032	0.42395	0.004809
151	0.0368472	0.417707	0.003348
152	0.0370913	0.411464	0.008364
153	0.0373353	0.37798	0.00132
154	0.0375793	0.407491	0.00489
155	0.0378233	0.41941	0.000708
156	0.0380673	0.433031	0.007836
157	0.0383114	0.419977	0.008847
158	0.0385554	0.446084	0.006948
159	0.0387994	0.414302	0.005934
160	0.0390434	0.444949	0.007305
161	0.0392875	0.440409	0.005436
162	0.0395315	0.42395	0.001365
163	0.0397755	0.422815	0.002703
164	0.0400195	0.447787	0.003717
165	0.0402635	0.434733	0.003204
166	0.0405076	0.448354	0.011859
167	0.0407516	0.462543	0.012873
168	0.0409956	0.437571	0.001659
169	0.0412396	0.448354	0.001911
170	0.0414837	0.446652	0.008538
171	0.0417277	0.434733	0.010815
172	0.0419717	0.442679	0.012624
173	0.0422157	0.450624	0.01284
174	0.0424597	0.456867	0.010599
175	0.0427038	0.445516	0.011811
176	0.0429478	0.46084	0.013155
177	0.0431918	0.458002	8.4e-05
178	0.0434358	0.470488	0.006543
179	0.0436798	0.46765	0.005169
180	0.0439239	0.473326	0.006183
181	0.0441679	0.451759	0.000444
182	0.0444119	0.46538	0.002487
183	0.0446559	0.442111	0.012279
184	0.0449	0.463678	0.010236
185	0.045144	0.4563	0.002505
186	0.045388	0.422247	0.009132
187	0.045632	0.469921	0.006588
188	0.045876	0.458002	0.011235
189	0.0461201	0.429625	0.001551
190	0.0463641	0.450057	0.00966
191	0.0466081	0.451759	0.001005
192	0.0468521	0.456867	0.001521
193	0.0470961	0.443814	0.00102
194	0.0473402	0.455732	0.010191
195	0.0475842	0.460272	0.004593
196	0.0478282	0.440976	0.01275
197	0.0480722	0.45403	0.000492
198	0.0483163	0.420545	0.012249
199	0.0485603	0.434166	0.014292
200	0.0488043	0.443246	0.007167
201	0.0490483	0.436436	0.015321
202	0.0492923	0.446652	0.0132
203	0.0495364	0.453462	0.005046
204	0.0497804	0.46311	0.001473
205	0.0500244	0.475028	0.002487
206	0.0502684	0.475028	0.00414
207	0.0505124	0.474461	0.00771
208	0.0507565	0.461407	0.01434
209	0.0510005	0.459705	0.014184
210	0.0512445	0.479001	0.007728
211	0.0514885	0.461407	0.010098
212	0.0517326	0.469353	0.008055
213	0.0519766	0.454597	0.00927
214	0.0522206	0.482406	0.002442
215	0.0524646	0.479569	0.014154
216	0.0527086	0.484677	0.004701
217	0.0529527	0.466515	0.013122
218	0.0531967	0.488082	0.012609
219	0.0534407	0.477866	0.003189
220	0.0536847	0.490919	0.000648
221	0.0539287	0.494892	0.014916
222	0.0541728	0.49773	0.009318
223	0.0544168	0.492622	0.010035
224	0.0546608	0.486379	0.001176
225	0.0549048	0.481271	0.013593
226	0.0551489	0.479569	0.012903
227	0.0553929	0.510216	0.002721
228	0.0556369	0.49319	0.008991
229	0.0558809	0.497162	0.006948
230	0.0561249	0.493757	0.001209
231	0.056369	0.489784	0.009363
232	0.056613	0.486947	0.011517
233	0.056857	0.487514	0.004281
234	0.057101	0.501135	0.016602
235	0.057345	0.475028	0.000723
236	0.0575891	0.510216	0.006402
237	0.0578331	0.498865	0.006339
238	0.0580771	0.494325	0.000738
239	0.0583211	0.50227	0.001254
240	0.0585652	0.5	0.017052
241	0.0588092	0.483541	0.006867
242	0.0590532	0.497162	0.001788
243	0.0592972	0.513053	0.010953
244	0.0595412	0.507946	0.012996
245	0.0597853	0.491487	0.017055
246	0.0600293	0.481271	0.018069
247	0.0602733	0.489217	0.011484
248	0.0605173	0.501135	0.004812
249	0.0607613	0.511351	0.007929
250	0.0610054	0.482406	0.009897
251	0.0612494	0.496027	0.005901
252	0.0614934	0.503973	0.004887
253	0.0617374	0.469921	0.017628
254	0.0619815	0.50681	0.006309
255	0.0622255	0.488649	0.007959
256	0.0624695	0.492622	0.016116
257	0.0627135	0.464813	0.016992
258	0.0629575	0.5	0.000333
259	0.0632016	0.492622	0.000681
260	0.0634456	0.465948	0.001695
261	0.0636896	0.473893	0.001878
262	0.0639336	0.475596	0.012891
263	0.0641776	0.480704	0.004734
264	0.0644217	0.49319	0.018702
265	0.0646657	0.487514	0.011577
266	0.0649097	0.49773	0.01389
267	0.0651537	0.46538	0.016431
268	0.0653978	0.488649	0.019233
269	0.0656418	0.496595	0.010578
270	0.0658858	0.505108	0.005718
271	0.0661298	0.471056	0.019248
272	0.0663738	0.471056	0.009066
273	0.0666179	0.486379	0.017223
274	0.0668619	0.49319	0.008568
275	0.0671059	0.517594	0.015372
276	0.0673499	0.512486	0.014181
277	0.0675939	0.468785	0.012813
278	0.067838	0.488649	0.009096
279	0.068082	0.510216	0.004143
280	0.068326	0.503405	0.010125
281	0.06857	0.50227	0.012285
282	0.0688141	0.519864	0.009627
283	0.0690581	0.505108	0.01584
284	0.0693021	0.499432	0.019911
285	0.0695461	0.484677	0.009642
286	0.0697901	0.494892	0.007101
287	0.0700342	0.485812	0.009144
288	0.0702782	0.521566	0.01785
289	0.0705222	0.518729	0.017337
290	0.0707662	0.520431	0.001539
291	0.0710102	0.524972	0.016308
292	0.0712543	0.519296	0.005604
293	0.0714983	0.505108	0.001524
294	0.0717423	0.520999	0.005595
295	0.0719863	0.49319	0.021891
296	0.0722304	0.473893	0.019887
297	0.0724744	0.509081	0.013221
298	0.0727184	0.509081	0.010218
299	0.0729624	0.528377	0.001563
300	0.0732064	0.5	0.014733
301	0.0734505	0.515891	0.01269
302	0.0736945	0.53462	0.010749
303	0.0739385	0.520999	0.017376
304	0.0741825	0.507378	0.016362
305	0.0744265	0.50227	6.6e-05
306	0.0746706	0.531782	0.020814
307	0.0749146	0.535187	0.018771
308	0.0751586	0.53462	0.012309
309	0.0754026	0.566969	0.013158
310	0.0756467	0.523269	0.021813
311	0.0758907	0.551078	0.00774
312	0.0761347	0.543133	0.002139
313	0.0763787	0.537457	0.004986
314	0.0766227	0.54597	0.021282
315	0.0768668	0.565267	0.003684
316	0.0771108	0.526674	0.001914
317	0.0773548	0.559591	0.021525
318	0.0775988	0.558456	0.018981
319	0.0778429	0.526674	0.004956
320	0.0780869	0.54143	0.007497
321	0.0783309	0.544268	0.015942
322	0.0785749	0.549376	0.008814
323	0.0788189	0.556186	0.013596
324	0.079063	0.568104	0.016137
325	0.079307	0.554484	0.019527
326	0.079551	0.555619	0.005937
327	0.079795	0.57151	0.011388
328	0.080039	0.563564	0.002733
329	0.0802831	0.574915	0.022734
330	0.0805271	0.547673	0.016107
331	0.0807711	0.56924	0.001218
332	0.0810151	0.545403	0.00285
333	0.0812592	0.544835	0.003777
334	0.0815032	0.553348	0.021102
335	0.0817472	0.557889	0.004806
336	0.0819912	0.565267	0.01449
337	0.0822352	0.557889	0.017088
338	0.0824793	0.565834	0.007878
339	0.0827233	0.596481	0.005361
340	0.0829673	0.584563	0.006375
341	0.0832113	0.57605	0.021144
342	0.0834553	0.594211	0.023691
343	0.0836994	0.552213	0.003303
344	0.0839434	0.554484	0.015015
345	0.0841874	0.552781	0.005367
346	0.0844314	0.553916	0.00741
347	0.0846755	0.558456	0.021114
348	0.0849195	0.578888	0.01761
349	0.0851635	0.57378	0.023139
350	0.0854075	0.570942	0.009468
351	0.0856515	0.577753	0.017625
352	0.0858956	0.57605	0.024252
353	0.0861396	0.552781	0.01407
354	0.0863836	0.568672	0.00987
355	0.0866276	0.552213	0.019683
356	0.0868716	0.555051	0.010368
357	0.0871157	0.572645	0.02208
358	0.0873597	0.589671	0.000171
359	0.0876037	0.550511	0.022578
360	0.0878477	0.544835	0.014424
361	0.0880918	0.585131	0.013908
362	0.0883358	0.61067	0.00189
363	0.0885798	0.576617	0.025107
364	0.0888238	0.585131	0.01695
365	0.0890678	0.586266	0.023301
366	0.0893119	0.58059	0.002166
367	0.0895559	0.607264	0.009048
368	0.0897999	0.631669	0.016419
369	0.0900439	0.610102	0.026604
370	0.0902879	0.594779	0.021288
371	0.090532	0.618615	0.019461
372	0.090776	0.575482	0.012834
373	0.09102	0.572645	0.022833
374	0.091264	0.564699	0.026403
375	0.0915081	0.57151	0.015873
376	0.0917521	0.570942	0.016887
377	0.0919961	0.559024	0.024015
378	0.0922401	0.612372	0.026934
379	0.0924841	0.579455	0.012288
380	0.0927282	0.570942	0.009624
381	0.0929722	0.597049	0.023892
382	0.0932162	0.552213	0.022878
383	0.0934602	0.556754	0.025512
384	0.0937042	0.552781	0.018885
385	0.0939483	0.561862	0.004554
386	0.0941923	0.576617	0.012711
387	0.0944363	0.602724	0.015813
388	0.0946803	0.596481	0.01374
389	0.0949244	0.570375	0.010197
390	0.0951684	0.572077	0.001014
391	0.0954124	0.548808	0.021396
392	0.0956564	0.511351	0.02088
393	0.0959004	0.574347	0.014784
394	0.0961445	0.583995	0.027525
395	0.0963885	0.553916	0.019338
396	0.0966325	0.58286	0.021879
397	0.0968765	0.589671	0.016779
398	0.0971205	0.560159	0.023907
399	0.0973646	0.57378	0.026448
400	0.0976086	0.535187	0.021444
401	0.0978526	0.577753	0.023892
402	0.0980966	0.573212	0.02553
403	0.0983407	0.580023	0.007578
404	0.0985847	0.547106	0.002478
405	0.0988287	0.526674	0.012663
406	0.0990727	0.551078	0.024375
407	0.0993167	0.599319	0.008235
408	0.0995608	0.555051	0.02556
409	0.0998048	0.584563	0.009264
410	0.100049	0.506243	0.023844
411	0.100293	0.549376	0.015687
412	0.100537	0.561294	0.021504
413	0.100781	0.53916	0.02202
414	0.101025	0.528377	0.018729
415	0.101269	0.545403	0.002931
416	0.101513	0.522134	0.026871
417	0.101757	0.539728	0.019494
418	0.102001	0.556186	0.01848
419	0.102245	0.540863	0.006987
420	0.102489	0.551078	0.022566
421	0.102733	0.544835	0.021552
422	0.102977	0.53235	0.028368
423	0.103221	0.551078	0.006456
424	0.103465	0.524404	0.025809
425	0.103709	0.526107	0.011385
426	0.103953	0.501703	0.003384
427	0.104197	0.555051	0.023112
428	0.104441	0.536322	0.0114
429	0.104685	0.582293	0.023238
430	0.104929	0.569807	0.012024
431	0.105173	0.537457	0.028227
432	0.105417	0.518161	0.02322
433	0.105661	0.484677	0.027291
434	0.105905	0.529512	0.009966
435	0.106149	0.490352	0.002775
436	0.106393	0.512486	0.009402
437	0.106637	0.493757	0.031314
438	0.106881	0.49319	0.025716
439	0.107125	0.468218	0.01809
440	0.107369	0.477299	0.022161
441	0.107613	0.468785	0.011976
442	0.107857	0.465948	0.021132
443	0.108102	0.462543	0.003834
444	0.108346	0.481271	0.027273
445	0.10859	0.492054	0.00945
446	0.108834	0.46538	0.006906
447	0.109078	0.501135	0.021177
448	0.109322	0.498297	0.00429
449	0.109566	0.462543	0.006831
450	0.10981	0.416572	0.018543
451	0.110054	0.405221	0.014973
452	0.110298	0.455732	0.01458
453	0.110542	0.392168	0.004395
454	0.110786	0.474461	0.02871
455	0.11103	0.486379	0.008481
456	0.111274	0.492054	0.001356
457	0.111518	0.514188	0.030906
458	0.111762	0.464245	0.01137
459	0.112006	0.448354	0.004743
460	0.11225	0.420545	0.0027
461	0.112494	0.395006	0.026637
462	0.112738	0.395006	0.019725
463	0.112982	0.410329	0.029409
464	0.113226	0.474461	0.011586
465	0.11347	0.38933	0.02127
466	0.113714	0.462543	0.013368
467	0.113958	0.42168	0.031191
468	0.114202	0.464245	0.016701
469	0.114446	0.418275	0.01335
470	0.11469	0.354143	0.002139
471	0.114934	0.418842	0.007737
472	0.115178	0.384222	0.018759
473	0.115422	0.362656	0.008574
474	0.115666	0.364359	0.029118
475	0.11591	0.388763	0.029472
476	0.116154	0.393871	0.026559
477	0.116398	0.438706	0.009234
478	0.116642	0.380817	0.030117
479	0.116886	0.383087	0.020433
480	0.11713	0.38706	0.019818
481	0.117374	0.375709	0.003522
482	0.117618	0.390465	0.025002
483	0.117862	0.37798	0.019833
484	0.118106	0.386493	0.020349
485	0.11835	0.402951	0.002061
486	0.118594	0.361521	0.003075
487	0.118838	0.360386	0.031599
488	0.119082	0.396141	0.025464
489	0.119327	0.356981	0.006111
490	0.119571	0.337684	0.000513
491	0.119815	0.316118	0.011199
492	0.120059	0.270148	0.029025
493	0.120303	0.330306	0.028035
494	0.120547	0.303632	0.029523
495	0.120791	0.34109	0.009198
496	0.121035	0.353575	0.011241
497	0.121279	0.351305	0.028566
498	0.121523	0.311578	0.003099
499	0.121767	0.333712	0.019308
500	0.122011	0.370034	0.011154
501	0.122255	0.345062	0.018279
502	0.122499	0.320658	0.006687
503	0.122743	0.340522	0.027069
504	0.122987	0.330306	0.019941
505	0.123231	0.288309	0.002118
506	0.123475	0.314983	0.011124
507	0.123719	0.331442	0.006204
508	0.123963	0.245176	0.033018
509	0.124207	0.266175	0.022515
510	0.124451	0.300795	0.012333
511	0.124695	0.275255	0.002436
512	0.124939	0.309875	0.004977
513	0.125183	0.300227	0.027387
514	0.125427	0.278093	0.010062
515	0.125671	0.317253	0.027132
516	0.125915	0.30193	0.028902
517	0.126159	0.283768	0.002178
518	0.126403	0.294552	0.008004
519	0.126647	0.294552	0.028884
520	0.126891	0.225312	0.025119
521	0.127135	0.292849	0.027162
522	0.127379	0.241203	0.01545
523	0.127623	0.23042	0.008487
524	0.127867	0.235528	0.004917
525	0.128111	0.234393	0.018156
526	0.128355	0.262202	0.023622
527	0.128599	0.221339	0.014967
528	0.128843	0.279796	0.024255
529	0.129087	0.277526	0.022212
530	0.129331	0.227015	0.030264
531	0.129575	0.226447	0.03078
532	0.129819	0.216799	0.01761
533	0.130063	0.217934	0.007926
534	0.130307	0.238365	0.012456
535	0.130551	0.221907	0.022179
536	0.130796	0.256527	0.034881
537	0.13104	0.22588	0.012471
538	0.131284	0.290579	0.005343
539	0.131528	0.204881	0.020121
540	0.131772	0.251419	0.00891
541	0.132016	0.235528	0.029811
542	0.13226	0.217367	0.013515
543	0.132504	0.272985	0.00639
544	0.132748	0.244608	0.008433
545	0.132992	0.248014	0.020091
546	0.133236	0.220204	0.030858
547	0.13348	0.247446	0.02976
548	0.133724	0.206583	0.021189
549	0.133968	0.233825	0.011004
550	0.134212	0.187287	0.002235
551	0.134456	0.162883	0.001335
552	0.1347	0.225312	0.017133
553	0.134944	0.185585	0.037371
554	0.135188	0.179909	0.007464
555	0.135432	0.220204	0.00798
556	0.135676	0.265607	0.01596
557	0.13592	0.217934	0.029199
558	0.136164	0.207151	0.025629
559	0.136408	0.217367	0.028377
560	0.136652	0.215096	0.015138
561	0.136896	0.212826	0.017181
562	0.13714	0.219069	0.008526
563	0.137384	0.157208	0.0093
564	0.137628	0.209421	0.019482
565	0.137872	0.171964	0.034251
566	0.138116	0.159478	0.027393
567	0.13836	0.140749	0.011097
568	0.138604	0.155505	0.003672
569	0.138848	0.194098	0.021495
570	0.139092	0.194098	0.020982
571	0.139336	0.185017	0.037608
572	0.13958	0.22361	0.016728
573	0.139824	0.152667	0.0096
574	0.140068	0.173099	0.002472
575	0.140312	0.221339	6.9e-05
576	0.140556	0.213394	0.022479
577	0.1408	0.185017	0.02502
578	0.141044	0.179909	0.016758
579	0.141288	0.209421	0.034083
580	0.141532	0.165153	0.003609
581	0.141776	0.177639	0.032055
582	0.14202	0.18672	0.015759
583	0.142265	0.189557	0.023916
584	0.142509	0.175369	0.00762
585	0.142753	0.182747	0.003549
586	0.142997	0.189557	0.003579
587	0.143241	0.1958	0.016818
588	0.143485	0.19353	0.023943
589	0.143729	0.165721	0.007137
590	0.143973	0.200908	0.036669
591	0.144217	0.167991	0.010173
592	0.144461	0.164018	0.002019
593	0.144705	0.160045	0.018315
594	0.144949	0.174234	0.025443
595	0.145193	0.194098	0.018813
596	0.145437	0.204881	0.036639
597	0.145681	0.166288	0.003612
598	0.145925	0.177072	0.03561
599	0.146169	0.168558	0.038151
600	0.146413	0.161748	0.021966
601	0.146657	0.148127	0.038652
602	0.146901	0.151532	0.019938
603	0.147145	0.148127	0.012813
604	0.147389	0.140749	0.007212
605	0.147633	0.153802	0.004671
606	0.147877	0.175369	0.002457
607	0.148121	0.174234	0.002643
608	0.148365	0.155505	0.013653
609	0.148609	0.143587	0.031476
610	0.148853	0.15437	0.024849
611	0.149097	0.132236	0.033504
612	0.149341	0.123723	0.037311
613	0.149585	0.127128	0.028656
614	0.149829	0.15664	0.020001
615	0.150073	0.14983	0.014403
616	0.150317	0.169694	0.005748
617	0.150561	0.141884	0.009318
618	0.150805	0.12202	0.038871
619	0.151049	0.164018	0.00882
620	0.151293	0.173666	0.016647
621	0.151537	0.148695	0.031416
622	0.151781	0.192963	0.027843
623	0.152025	0.132236	0.024273
624	0.152269	0.149262	0.040428
625	0.152513	0.139047	0.040056
626	0.152757	0.126561	0.023118
627	0.153001	0.127128	0.000708
628	0.153245	0.148695	0.016506
629	0.15349	0.172531	0.023133
630	0.153734	0.150965	0.005388
631	0.153978	0.145857	0.0171
632	0.154222	0.170829	0.03996
633	0.154466	0.167991	0.037419
634	0.15471	0.161748	0.032367
635	0.154954	0.188422	0.039975
636	0.155198	0.167991	0.025209
637	0.155442	0.194098	0.013497
638	0.155686	0.194098	0.010953
639	0.15593	0.160045	0.000756
640	0.156174	0.14983	0.009411
641	0.156418	0.140182	0.008898
642	0.156662	0.160045	0.028251
643	0.156906	0.179909	0.034923
644	0.15715	0.177072	0.036966
645	0.157394	0.160045	0.034425
646	0.157638	0.175936	0.016599
647	0.157882	0.192963	0.004887
648	0.158126	0.208854	0.006825
649	0.15837	0.166856	0.001725
650	0.158614	0.196368	0.029355
651	0.158858	0.170261	0.039039
652	0.159102	0.171396	0.010878
653	0.159346	0.178207	0.030231
654	0.15959	0.190125	0.032943
655	0.159834	0.174801	0.005949
656	0.160078	0.187855	0.007992
657	0.160322	0.194098	0.00372
658	0.160566	0.157208	0.015432
659	0.16081	0.188422	0.028671
660	0.161054	0.163451	0.037326
661	0.161298	0.148127	0.033489
662	0.161542	0.162316	0.020247
663	0.161786	0.157208	0.012858
664	0.16203	0.144722	0.003174
665	0.162274	0.160045	0.035547
666	0.162518	0.196935	0.03606
667	0.162762	0.133371	0.036783
668	0.163006	0.132236	0.030978
669	0.16325	0.131669	0.000603
670	0.163494	0.124291	0.015195
671	0.163738	0.103292	0.015711
672	0.163982	0.11294	0.011286
673	0.164226	0.079455	0.024525
674	0.16447	0.123156	0.034707
675	0.164714	0.107264	0.036108
676	0.164959	0.128831	0.006057
677	0.165203	0.125426	0.027051
678	0.165447	0.103859	0.03918
679	0.165691	0.116345	0.006153
680	0.165935	0.093076	0.022452
681	0.166179	0.109535	0.039195
682	0.166423	0.108967	0.032067
683	0.166667	0.098184	0.021885
684	0.166911	0.114642	0.014757
685	0.167155	0.11975	0.025992
686	0.167399	0.102157	0.040758
687	0.167643	0.12202	0.02649
688	0.167887	0.112372	0.042786
689	0.168131	0.141884	0.020388
690	0.168375	0.102157	0.007146
691	0.168619	0.083995	0.003078
692	0.168863	0.1084	0.014748
693	0.169107	0.093644	0.032571
694	0.169351	0.120318	0.036714
695	0.169595	0.093076	0.034599
696	0.169839	0.114075	0.005049
697	0.170083	0.114075	0.021345
698	0.170327	0.104427	0.013188
699	0.170571	0.102724	0.018786
700	0.170815	0.130533	0.032028
701	0.171059	0.102724	0.000582
702	0.171303	0.11521	0.01638
703	0.171547	0.121453	0.019785
704	0.171791	0.096481	0.010101
705	0.172035	0.076617	0.027924
706	0.172279	0.087968	0.041166
707	0.172523	0.097049	0.028122
708	0.172767	0.087401	0.030966
709	0.173011	0.088536	0.010584
710	0.173255	0.091941	0.040362
711	0.173499	0.104994	0.038592
712	0.173743	0.109535	0.004455
713	0.173987	0.101589	0.04062
714	0.174231	0.118615	0.01797
715	0.174475	0.1084	0.028893
716	0.174719	0.080023	0.008511
717	0.174963	0.099886	0.027864
718	0.175207	0.111237	0.003216
719	0.175451	0.132804	0.031239
720	0.175695	0.094211	0.015621
721	0.175939	0.079455	0.001353
722	0.176184	0.072645	0.029727
723	0.176428	0.045403	0.024129
724	0.176672	0.052781	0.038016
725	0.176916	0.07151	0.038913
726	0.17716	0.07378	0.025671
727	0.177404	0.067537	0.006321
728	0.177648	0.077753	0.032901
729	0.177892	0.06924	0.030858
730	0.178136	0.032917	0.024231
731	0.17838	0.074347	0.016074
732	0.178624	0.076617	0.004308
733	0.178868	0.040295	0.015519
734	0.179112	0.093644	0.040512
735	0.179356	0.093076	0.030303
736	0.1796	0.045403	0.030312
737	0.179844	0.053348	0.040497
738	0.180088	0.059024	0.028791
739	0.180332	0.028377	0.010965
740	0.180576	0.026107	0.006858
741	0.18082	0.064132	0.03492
742	0.181064	0.00681	0.042507
743	0.181308	0.011918	0.039006
744	0.181552	0.042565	0.004371
745	0.181796	0.028944	0.002757
746	0.18204	0.052781	0.02211
747	0.182284	0.027242	0.009369
748	0.182528	0.061862	0.019554
749	0.182772	0.016459	0.03432
750	0.183016	0.030647	0.021579
751	0.18326	0.003973	0.003387
752	0.183504	0.003405	0.029883
753	0.183748	0.013621	0.029205
754	0.183992	0.007378	0.004239
755	0.184236	0.017594	0.032955
756	0.18448	0.007378	0.023076
757	0.184724	0.008513	0.005751
758	0.184968	0.029512	0.023799
759	0.185212	0.046538	0.039873
760	0.185456	0.003973	0.027885
761	0.1857	0.023269	0.026619
762	0.185944	0.026107	0.026103
763	0.186188	0.014756	0.022533
764	0.186432	0.005675	0.002151
765	0.186676	0.059024	0.031986
766	0.18692	0.056186	0.019461
767	0.187164	0.070375	0.002451
768	0.187408	0.098184	0.041172
769	0.187653	0.080023	0.021819
770	0.187897	0.064132	0.040326
771	0.188141	0.053916	0.036603
772	0.188385	0.07605	0.028599
773	0.188629	0.074915	0.007065
774	0.188873	0.107832	0.042732
775	0.189117	0.11975	0.039282
776	0.189361	0.058456	0.002496
777	0.189605	0.095346	0.044274
778	0.189849	0.078888	0.023394
779	0.190093	0.029512	0.011682
780	0.190337	0.076617	0.013785
781	0.190581	0.075482	0.033138
782	0.190825	0.079455	0.039207
783	0.191069	0.104994	0.019854
784	0.191313	0.061862	0.000501
785	0.191557	0.121453	0.028524
786	0.191801	0.132236	0.013755
787	0.192045	0.123156	0.043308
788	0.192289	0.141884	0.022425
789	0.192533	0.091941	1.8e-05
790	0.192777	0.108967	0.03462
791	0.193021	0.097049	0.037161
792	0.193265	0.105562	0.036711
793	0.193509	0.089671	0.017358
794	0.193753	0.093644	0.000468
795	0.193997	0.107832	0.038256
796	0.194241	0.066402	0.041826
797	0.194485	0.11521	0.044772
798	0.194729	0.1084	0.027573
799	0.194973	0.135074	0.012804
800	0.195217	0.118615	0.001965
801	0.195461	0.105562	0.013677
802	0.195705	0.114075	0.03303
803	0.195949	0.113507	0.006534
804	0.196193	0.102724	0.031998
805	0.196437	0.140749	0.022005
806	0.196681	0.139047	0.023328
807	0.196925	0.127128	0.021507
808	0.197169	0.162316	0.014658
809	0.197413	0.097049	0.040875
810	0.197657	0.097616	0.021522
811	0.197901	0.136776	0.002169
812	0.198145	0.134506	0.030192
813	0.198389	0.1084	0.019728
814	0.198633	0.150397	0.025107
815	0.198878	0.1521	0.02715
816	0.199122	0.097616	0.012381
817	0.199366	0.111805	0.005442
818	0.19961	0.142452	0.023268
819	0.199854	0.095346	0.042621
820	0.200098	0.091373	0.031251
821	0.200342	0.106697	0.038535
822	0.200586	0.087401	0.012039
823	0.20083	0.107264	0.023751
824	0.201074	0.123723	0.045537
825	0.201318	0.139614	0.026184
826	0.201562	0.131101	0.008358
827	0.201806	0.127128	0.009465
828	0.20205	0.111805	0.027291
829	0.202294	0.114075	0.045114
830	0.202538	0.095346	0.027228
831	0.202782	0.140182	0.010932
832	0.203026	0.103859	0.037428
833	0.20327	0.145857	0.02166
834	0.203514	0.120885	0.026229
835	0.203758	0.097616	0.037443
836	0.204002	0.119183	0.019617
837	0.204246	0.115778	0.000264
838	0.20449	0.11067	0.016032
839	0.204734	0.091373	0.030801
840	0.204978	0.092509	0.027228
841	0.205222	0.078888	0.028305
842	0.205466	0.076617	0.010917
843	0.20571	0.068672	0.008874
844	0.205954	0.096481	0.035868
845	0.206198	0.088536	0.039939
846	0.206442	0.098751	0.033933
847	0.206686	0.11294	0.017637
848	0.20693	0.052213	0.001341
849	0.207174	0.073212	0.029364
850	0.207418	0.064132	0.042105
851	0.207662	0.03916	0.044493
852	0.207906	0.070375	0.04092
853	0.20815	0.052213	0.005442
854	0.208394	0.06924	0.005955
855	0.208638	0.057321	0.011868
856	0.208882	0.063564	0.029694
857	0.209126	0.066969	0.04446
858	0.20937	0.069807	0.029409
859	0.209614	0.065834	0.031452
860	0.209858	0.062997	0.003183
861	0.210102	0.07151	0.022536
862	0.210347	0.077185	0.038832
863	0.210591	0.051646	0.03504
864	0.210835	0.061862	0.018744
865	0.211079	0.052213	0.002448
866	0.211323	0.04143	0.013851
867	0.211567	0.049376	0.030147
868	0.211811	0.04597	0.033027
869	0.212055	0.048808	0.021474
870	0.212299	0.053348	0.015717
871	0.212543	0.058456	0.003636
872	0.212787	0.043133	0.021459
873	0.213031	0.07605	0.039285
874	0.213275	0.050511	0.03306
875	0.213519	0.064699	0.013707
876	0.213763	0.056754	0.005646
877	0.214007	0.049943	0.024999
878	0.214251	0.099886	0.006147
879	0.214495	0.077185	0.032574
880	0.214739	0.068104	0.030033
881	0.214983	0.065267	0.019851
882	0.215227	0.083995	0.008673
883	0.215471	0.058456	0.028026
884	0.215715	0.040295	0.044322
885	0.215959	0.041998	0.006624
886	0.216203	0.069807	0.037179
887	0.216447	0.044268	0.004572
888	0.216691	0.068672	0.023925
889	0.216935	0.053348	0.00507
890	0.217179	0.052213	0.015255
891	0.217423	0.033485	0.018882
892	0.217667	0.038593	0.000471
893	0.217911	0.049943	0.042747
894	0.218155	0.045403	0.029595
895	0.218399	0.048808	0.042336
896	0.218643	0.019864	0.022983
897	0.218887	0.041998	0.002103
898	0.219131	0.028377	0.01725
899	0.219375	0.040295	0.035226
900	0.219619	0.029512	0.040326
901	0.219863	0.03916	0.038631
902	0.220107	0.032917	0.032184
903	0.220351	0.005108	0.023847
904	0.220595	0.036322	0.009579
905	0.220839	0.031215	0.023031
906	0.221083	0.026674	0.009789
907	0.221327	0.005675	0.009564
908	0.221571	0.014188	0.028917
909	0.221816	0.012486	0.044955
910	0.22206	0.001135	0.025602
911	0.222304	0.002838	0.019731
912	0.222548	0.001135	0.014631
913	0.222792	0.00681	0.030927
914	0.223036	0.007378	0.004431
915	0.22328	0.020431	0.037347
916	0.223524	0.040863	0.017994
917	0.223768	0.028944	0.004416
918	0.224012	0.038593	0.026826
919	0.224256	0.019296	0.043989
920	0.2245	0.039728	0.021579
921	0.224744	0.060726	0.000831
922	0.224988	0.033485	0.01191
923	0.225232	0.056754	0.005913
924	0.225476	0.03689	0.032808
925	0.22572	0.038025	0.039435
926	0.225964	0.052213	0.002841
927	0.226208	0.042565	0.002328
928	0.226452	0.065834	0.019584
929	0.226696	0.077185	0.039966
930	0.22694	0.07378	0.019083
931	0.227184	0.066969	0.023193
932	0.227428	0.101589	0.019623
933	0.227672	0.106697	0.038976
934	0.227916	0.118615	0.024705
935	0.22816	0.104994	0.002796
936	0.228404	0.11521	0.005361
937	0.228648	0.127696	0.012465
938	0.228892	0.094211	0.039459
939	0.229136	0.135074	0.025242
940	0.22938	0.121453	0.008946
941	0.229624	0.131669	0.017103
942	0.229868	0.132804	0.000723
943	0.230112	0.133939	0.020076
944	0.230356	0.15664	0.044628
945	0.2306	0.167423	0.040557
946	0.230844	0.162316	0.022731
947	0.231088	0.146425	0.030888
948	0.231332	0.159478	0.019029
949	0.231576	0.165721	0.020043
950	0.23182	0.170829	0.009507
951	0.232064	0.19126	0.043467
952	0.232308	0.165153	0.028875
953	0.232552	0.194098	0.009525
954	0.232796	0.192963	0.008301
955	0.233041	0.202611	0.026127
956	0.233285	0.178774	0.04395
957	0.233529	0.199205	0.003702
958	0.233773	0.191827	0.019737
959	0.234017	0.19353	0.037062
960	0.234261	0.208854	0.009798
961	0.234505	0.197503	0.026094
962	0.234749	0.171396	0.04239
963	0.234993	0.196935	0.023838
964	0.235237	0.202043	0.003156
965	0.235481	0.216232	0.00417
966	0.235725	0.194098	0.031164
967	0.235969	0.197503	0.015366
968	0.236213	0.212826	0.031662
969	0.236457	0.198638	0.01128
970	0.236701	0.187855	0.013686
971	0.236945	0.218502	0.036231
972	0.237189	0.18672	0.011265
973	0.237433	0.206583	0.007695
974	0.237677	0.202611	0.04233
975	0.237921	0.211691	0.034173
976	0.238165	0.199773	0.039699
977	0.238409	0.184449	0.005064
978	0.238653	0.215664	0.010161
979	0.238897	0.206583	0.006135
980	0.239141	0.205448	0.007149
981	0.239385	0.232123	0.033102
982	0.239629	0.222474	0.029031
983	0.239873	0.249149	0.040245
984	0.240117	0.221339	0.023946
985	0.240361	0.208286	0.015273
986	0.240605	0.214529	0.005589
987	0.240849	0.233825	0.021885
988	0.241093	0.225312	0.02142
989	0.241337	0.263905	0.038745
990	0.241581	0.22815	0.020922
991	0.241825	0.245176	0.012267
992	0.242069	0.263337	0.005559
993	0.242313	0.258797	0.011769
994	0.242557	0.260499	0.036624
995	0.242801	0.248014	0.020826
996	0.243045	0.26277	0.03318
997	0.243289	0.27185	0.024525
998	0.243533	0.263905	0.000585
999	0.243777	0.296254	0.015711
1000	0.244021	0.247446	0.00144
1001	0.244265	0.295687	0.012828
1002	0.24451	0.288309	0.031683
1003	0.244754	0.287174	0.015384
1004	0.244998	0.286606	0.002439
1005	0.245242	0.320091	0.010302
1006	0.245486	0.312145	0.035031
1007	0.24573	0.292849	0.038838
1008	0.245974	0.337684	0.021015
1009	0.246218	0.330874	0.013887
1010	0.246462	0.322928	0.025101
1011	0.246706	0.333712	0.044685
1012	0.24695	0.363791	0.029187
1013	0.247194	0.341657	0.038871
1014	0.247438	0.366629	0.004935
1015	0.247682	0.362656	0.003222
1016	0.247926	0.351305	0.016131
1017	0.24817	0.359251	0.00492
1018	0.248414	0.376277	0.018159
1019	0.248658	0.3479	0.025146
1020	0.248902	0.362656	0.020187
1021	0.249146	0.388195	0.010503
1022	0.24939	0.37798	0.029856
1023	0.249634	0.393871	0.044016
1024	0.249878	0.381952	0.010488
1025	0.250122	0.385925	0.008367
1026	0.250366	0.383087	0.021108
1027	0.25061	0.376277	0.003282
1028	0.250854	0.372872	0.035892
1029	0.251098	0.34109	0.018612
1030	0.251342	0.388195	0.02775
1031	0.251586	0.375709	0.038964
1032	0.25183	0.364359	0.004842
1033	0.252074	0.389898	0.022668
1034	0.252318	0.408627	0.023697
1035	0.252562	0.397276	0.036438
1036	0.252806	0.414869	0.007368
1037	0.25305	0.395573	0.028296
1038	0.253294	0.416572	0.026208
1039	0.253538	0.404654	0.042504
1040	0.253782	0.398411	0.026706
1041	0.254026	0.405789	0.007851
1042	0.25427	0.446652	0.033927
1043	0.254514	0.408627	0.017628
1044	0.254758	0.399546	0.001332
1045	0.255002	0.391033	0.011016
1046	0.255246	0.400681	0.028203
1047	0.25549	0.439841	0.015102
1048	0.255735	0.409194	0.00492
1049	0.255979	0.416572	0.019188
1050	0.256223	0.400681	0.002892
1051	0.256467	0.418275	0.011049
1052	0.256711	0.410897	0.028173
1053	0.256955	0.447219	0.018489
1054	0.257199	0.431328	0.036312
1055	0.257443	0.417707	0.014403
1056	0.257687	0.440409	0.003189
1057	0.257931	0.42622	0.00726
1058	0.258175	0.414302	0.025086
1059	0.258419	0.441544	0.042909
1060	0.258663	0.42395	0.001926
1061	0.258907	0.409194	0.014667
1062	0.259151	0.401816	0.004686
1063	0.259395	0.455732	0.024039
1064	0.259639	0.429625	0.008244
1065	0.259883	0.465948	0.00297
1066	0.260127	0.436436	0.017238
1067	0.260371	0.482974	0.002115
1068	0.260615	0.453462	0.033693
1069	0.260859	0.478434	0.04629
1070	0.261103	0.467083	0.007071
1071	0.261347	0.450624	0.022869
1072	0.261591	0.45403	0.028578
1073	0.261835	0.4563	0.006669
1074	0.262079	0.441544	0.024492
1075	0.262323	0.435868	0.042318
1076	0.262567	0.415437	0.037668
1077	0.262811	0.447787	0.041289
1078	0.263055	0.452894	0.005073
1079	0.263299	0.42395	0.01275
1080	0.263543	0.424518	0.00765
1081	0.263787	0.429058	0.045342
1082	0.264031	0.424518	0.02853
1083	0.264275	0.427923	0.029043
1084	0.264519	0.401249	0.028029
1085	0.264763	0.434733	0.021888
1086	0.265007	0.41941	0.016791
1087	0.265251	0.446084	0.033087
1088	0.265495	0.404086	0.031044
1089	0.265739	0.426788	0.027546
1090	0.265983	0.425653	0.00972
1091	0.266227	0.399546	0.01482
1092	0.266471	0.437003	0.022872
1093	0.266715	0.42849	0.022356
1094	0.266959	0.454597	0.000447
1095	0.267204	0.42168	0.038274
1096	0.267448	0.464813	0.028455
1097	0.267692	0.456867	0.006543
1098	0.267936	0.457435	0.022842
1099	0.26818	0.453462	0.008571
1100	0.268424	0.443246	0.035565
1101	0.268668	0.443246	0.036579
1102	0.268912	0.471056	0.023538
1103	0.269156	0.407491	0.004185
1104	0.2694	0.430193	0.012111
1105	0.269644	0.417707	0.028407
1106	0.269888	0.459137	0.011841
1107	0.270132	0.434166	0.029166
1108	0.270376	0.439841	0.04062
1109	0.27062	0.420545	0.002688
1110	0.270864	0.406356	0.010554
1111	0.271108	0.435868	0.02685
1112	0.271352	0.427923	0.041616
1113	0.271596	0.418275	0.030726
1114	0.27184	0.451192	0.0129
1115	0.272084	0.464245	0.038544
1116	0.272328	0.403519	0.00288
1117	0.272572	0.438138	0.006951
1118	0.272816	0.412599	0.030243
1119	0.27306	0.398978	0.042984
1120	0.273304	0.42849	0.025158
1121	0.273548	0.427923	0.018033
1122	0.273792	0.430193	0.007434
1123	0.274036	0.406924	0.02526
1124	0.27428	0.450624	0.043083
1125	0.274524	0.422815	0.037983
1126	0.274768	0.421112	0.037416
1127	0.275012	0.448922	0.013479
1128	0.275256	0.459137	0.007404
1129	0.2755	0.475028	0.02217
1130	0.275744	0.501135	0.014016
1131	0.275988	0.46765	0.010953
1132	0.276232	0.487514	0.029805
1133	0.276476	0.49319	0.011982
1134	0.27672	0.488082	0.015552
1135	0.276964	0.482406	0.020613
1136	0.277208	0.485244	0.038436
1137	0.277452	0.487514	0.021111
1138	0.277696	0.502838	0.003855
1139	0.27794	0.471056	0.008955
1140	0.278184	0.471056	0.033321
1141	0.278429	0.481839	0.02211
1142	0.278673	0.474461	0.015084
1143	0.278917	0.486379	0.000315
1144	0.279161	0.480136	0.013056
1145	0.279405	0.471056	0.006297
1146	0.279649	0.470488	0.028707
1147	0.279893	0.488649	0.042108
1148	0.280137	0.481271	0.021228
1149	0.280381	0.494892	0.000345
1150	0.280625	0.481839	0.020535
1151	0.280869	0.489784	0.016659
1152	0.281113	0.468785	0.040098
1153	0.281357	0.471056	0.019215
1154	0.281601	0.517026	0.018201
1155	0.281845	0.468218	0.027132
1156	0.282089	0.516459	0.044955
1157	0.282333	0.485244	0.027387
1158	0.282577	0.493757	0.009564
1159	0.282821	0.515323	0.008262
1160	0.283065	0.508513	0.021501
1161	0.283309	0.514188	0.012636
1162	0.283553	0.520431	0.028431
1163	0.283797	0.509081	0.02607
1164	0.284041	0.511918	0.044745
1165	0.284285	0.535187	0.031155
1166	0.284529	0.509081	0.027585
1167	0.284773	0.531782	0.027948
1168	0.285017	0.535187	0.005538
1169	0.285261	0.544268	0.016872
1170	0.285505	0.530647	0.039279
1171	0.285749	0.53235	0.032652
1172	0.285993	0.516459	0.038163
1173	0.286237	0.53689	0.005643
1174	0.286481	0.552213	0.024996
1175	0.286725	0.53916	0.009141
1176	0.286969	0.519296	0.000486
1177	0.287213	0.528944	0.017811
1178	0.287457	0.539728	1.2e-05
1179	0.287701	0.514188	0.032595
1180	0.287945	0.522701	0.012738
1181	0.288189	0.530647	0.038208
1182	0.288433	0.503973	0.018855
1183	0.288677	0.515891	0.003552
1184	0.288921	0.523269	0.03819
1185	0.289165	0.510783	0.038739
1186	0.289409	0.518729	0.036198
1187	0.289653	0.535187	0.015249
1188	0.289898	0.530079	0.005133
1189	0.290142	0.54597	0.01422
1190	0.290386	0.547106	0.032046
1191	0.29063	0.550511	0.040299
1192	0.290874	0.526674	0.022473
1193	0.291118	0.556186	0.007707
1194	0.291362	0.539728	0.011646
1195	0.291606	0.566402	0.029472
1196	0.29185	0.586833	0.006192
1197	0.292094	0.554484	0.040329
1198	0.292338	0.56924	0.014862
1199	0.292582	0.541998	0.002961
1200	0.292826	0.560726	0.023844
1201	0.29307	0.563564	0.043197
1202	0.293314	0.566969	0.029148
1203	0.293558	0.5437	0.009795
1204	0.293802	0.566402	0.008031
1205	0.294046	0.530079	0.024327
1206	0.29429	0.584563	0.031206
1207	0.294534	0.565834	0.039363
1208	0.294778	0.56924	0.021537
1209	0.295022	0.572077	0.005241
1210	0.295266	0.564132	0.006471
1211	0.29551	0.567537	0.024294
1212	0.295754	0.576617	0.026838
1213	0.295998	0.581725	0.024111
1214	0.296242	0.538025	0.029211
1215	0.296486	0.566969	0.031254
1216	0.29673	0.564132	0.043992
1217	0.296974	0.556754	0.021207
1218	0.297218	0.581725	0.039033
1219	0.297462	0.560159	0.034839
1220	0.297706	0.560726	0.017013
1221	0.29795	0.597616	0.009888
1222	0.298194	0.596481	0.012522
1223	0.298438	0.583428	0.007422
1224	0.298682	0.598751	0.045114
1225	0.298926	0.568672	0.007362
1226	0.29917	0.568104	0.012462
1227	0.299414	0.579455	0.002307
1228	0.299658	0.604994	0.020133
1229	0.299902	0.585698	0.039486
1230	0.300146	0.609535	0.034386
1231	0.30039	0.583428	0.041013
1232	0.300634	0.616913	0.000264
1233	0.300878	0.595914	0.02829
1234	0.301122	0.606697	0.032328
1235	0.301367	0.602724	0.043074
1236	0.301611	0.606129	0.026775
1237	0.301855	0.572077	0.008952
1238	0.302099	0.578888	0.007344
1239	0.302343	0.586833	0.02364
1240	0.302587	0.590238	0.039939
1241	0.302831	0.585131	0.033933
1242	0.303075	0.572077	0.013053
1243	0.303319	0.574915	0.002868
1244	0.303563	0.580023	0.035478
1245	0.303807	0.552213	0.035838
1246	0.304051	0.531782	0.036507
1247	0.304295	0.573212	0.017154
1248	0.304539	0.528944	0.005256
1249	0.304783	0.568104	0.026136
1250	0.305027	0.56924	0.040905
1251	0.305271	0.549376	0.037335
1252	0.305515	0.555051	0.005973
1253	0.305759	0.540295	0.03936
1254	0.306003	0.584563	0.00828
1255	0.306247	0.564132	0.026106
1256	0.306491	0.615778	0.044709
1257	0.306735	0.550511	0.008544
1258	0.306979	0.582293	0.026091
1259	0.307223	0.57151	0.017217
1260	0.307467	0.547673	0.028119
1261	0.307711	0.572077	0.018246
1262	0.307955	0.581158	0.014862
1263	0.308199	0.57151	0.013161
1264	0.308443	0.570375	0.010776
1265	0.308687	0.563564	0.027072
1266	0.308931	0.562429	0.044898
1267	0.309175	0.553916	0.030501
1268	0.309419	0.576617	0.014205
1269	0.309663	0.560726	0.017778
1270	0.309907	0.606697	0.024405
1271	0.310151	0.601589	0.031626
1272	0.310395	0.572077	0.041811
1273	0.310639	0.604427	0.032061
1274	0.310883	0.57832	0.012708
1275	0.311127	0.562429	0.013224
1276	0.311371	0.58059	0.022941
1277	0.311615	0.602157	0.040767
1278	0.311859	0.585698	0.030048
1279	0.312103	0.557321	0.030567
1280	0.312347	0.583995	0.043305
1281	0.312592	0.573212	0.015783
1282	0.312836	0.551646	0.038193
1283	0.31308	0.599886	0.032622
1284	0.313324	0.594779	0.010212
1285	0.313568	0.57378	0.010668
1286	0.313812	0.589671	0.037662
1287	0.314056	0.566402	0.040794
1288	0.3143	0.585698	0.0138
1289	0.314544	0.597616	0.03459
1290	0.314788	0.606129	0.007188
1291	0.315032	0.592509	0.016872
1292	0.315276	0.589671	0.039159
1293	0.31552	0.613507	0.005022
1294	0.315764	0.600454	0.016887
1295	0.316008	0.599319	0.003648
1296	0.316252	0.594211	0.025557
1297	0.316496	0.603859	0.004677
1298	0.31674	0.577185	0.043713
1299	0.316984	0.599886	0.029445
1300	0.317228	0.601022	0.016917
1301	0.317472	0.599886	0.040641
1302	0.317716	0.602157	0.018732
1303	0.31796	0.614075	0.018216
1304	0.318204	0.6084	0.014646
1305	0.318448	0.61975	0.021018
1306	0.318692	0.6084	0.001665
1307	0.318936	0.604427	0.026634
1308	0.31918	0.593644	0.032454
1309	0.319424	0.618615	0.012072
1310	0.319668	0.592509	0.023592
1311	0.319912	0.602157	0.029382
1312	0.320156	0.589103	0.002889
1313	0.3204	0.570942	0.029721
1314	0.320644	0.57378	0.035481
1315	0.320888	0.594211	0.008985
1316	0.321132	0.58059	0.000699
1317	0.321376	0.563564	0.01254
1318	0.32162	0.590806	0.028836
1319	0.321864	0.587401	0.011511
1320	0.322108	0.613507	0.033921
1321	0.322352	0.603292	0.044106
1322	0.322596	0.61748	0.0099
1323	0.32284	0.604427	0.002772
1324	0.323084	0.604427	0.012456
1325	0.323328	0.604427	0.035934
1326	0.323572	0.566402	0.033354
1327	0.323816	0.601022	0.012471
1328	0.324061	0.611237	0.012993
1329	0.324305	0.580023	0.024705
1330	0.324549	0.599886	0.001791
1331	0.324793	0.602724	0.017562
1332	0.325037	0.602724	0.013518
1333	0.325281	0.599319	0.021672
1334	0.325525	0.601022	0.032886
1335	0.325769	0.612372	0.044097
1336	0.326013	0.587968	0.042498
1337	0.326257	0.604994	0.040455
1338	0.326501	0.603859	0.005907
1339	0.326745	0.576617	0.014976
1340	0.326989	0.634506	0.029742
1341	0.327233	0.600454	0.039927
1342	0.327477	0.601022	0.018015
1343	0.327721	0.606129	0.023613
1344	0.327965	0.610102	0.008994
1345	0.328209	0.587401	0.020208
1346	0.328453	0.603859	0.023598
1347	0.328697	0.61067	0.002898
1348	0.328941	0.605562	0.037032
1349	0.329185	0.641317	0.019209
1350	0.329429	0.640182	0.038061
1351	0.329673	0.642452	0.008799
1352	0.329917	0.639614	0.037323
1353	0.330161	0.620318	0.010569
1354	0.330405	0.622588	0.039351
1355	0.330649	0.610102	0.031194
1356	0.330893	0.597616	0.018225
1357	0.331137	0.601589	0.038607
1358	0.331381	0.587968	0.017424
1359	0.331625	0.625426	0.035247
1360	0.331869	0.599886	0.037095
1361	0.332113	0.585131	0.019269
1362	0.332357	0.614075	0.022842
1363	0.332601	0.597616	0.010266
1364	0.332845	0.635074	0.002475
1365	0.333089	0.624291	0.033555
1366	0.333333	0.627696	0.017259
1367	0.333577	0.632236	0.011661
1368	0.333821	0.633371	0.016758
1369	0.334065	0.64983	0.001065
1370	0.334309	0.612372	0.023901
1371	0.334553	0.644722	0.042756
1372	0.334797	0.65664	0.02646
1373	0.335041	0.614642	0.010164
1374	0.335286	0.622588	0.006135
1375	0.33553	0.635641	0.011733
1376	0.335774	0.615778	0.028029
1377	0.336018	0.655505	0.041259
1378	0.336262	0.620318	0.024963
1379	0.336506	0.615778	0.037704
1380	0.33675	0.61521	0.022935
1381	0.336994	0.602157	0.022398
1382	0.337238	0.594211	0.031053
1383	0.337482	0.611237	0.042816
1384	0.337726	0.58059	0.037218
1385	0.33797	0.591373	0.011754
1386	0.338214	0.593644	0.006072
1387	0.338458	0.586266	0.032649
1388	0.338702	0.590238	0.011769
1389	0.338946	0.585698	0.024396
1390	0.33919	0.57378	0.032664
1391	0.339434	0.57151	0.016368
1392	0.339678	0.567537	0.003129
1393	0.339922	0.572077	0.01011
1394	0.340166	0.565834	0.040161
1395	0.34041	0.580023	0.039648
1396	0.340654	0.564132	0.025377
1397	0.340898	0.58059	0.028626
1398	0.341142	0.58286	0.0108
1399	0.341386	0.570375	0.020484
1400	0.34163	0.573212	0.019473
1401	0.341874	0.573212	0.02739
1402	0.342118	0.568672	0.019233
1403	0.342362	0.582293	0.031713
1404	0.342606	0.577185	0.016944
1405	0.34285	0.555619	0.002178
1406	0.343094	0.550511	0.008007
1407	0.343338	0.559024	0.024303
1408	0.343582	0.562429	0.040599
1409	0.343826	0.572645	0.028689
1410	0.34407	0.565267	0.026145
1411	0.344314	0.567537	0.000849
1412	0.344558	0.574347	0.024786
1413	0.344802	0.560726	0.035331
1414	0.345046	0.568104	0.017643
1415	0.34529	0.574915	0.006432
1416	0.345534	0.589671	0.024648
1417	0.345778	0.593644	0.029748
1418	0.346022	0.589671	0.018036
1419	0.346266	0.595914	0.006324
1420	0.34651	0.588536	0.014556
1421	0.346755	0.596481	0.014043
1422	0.346999	0.588536	0.018111
1423	0.347243	0.581158	0.03288
1424	0.347487	0.590806	0.02418
1425	0.347731	0.6084	0.023166
1426	0.347975	0.605562	0.009927
1427	0.348219	0.619183	0.003312
1428	0.348463	0.61975	0.011967
1429	0.348707	0.602724	0.023679
1430	0.348951	0.615778	0.037965
1431	0.349195	0.61294	0.027783
1432	0.349439	0.61294	0.037467
1433	0.349683	0.608967	0.028812
1434	0.349927	0.603859	0.004875
1435	0.350171	0.594211	0.008367
1436	0.350415	0.612372	0.041052
1437	0.350659	0.632804	0.034845
1438	0.350903	0.629966	0.019047
1439	0.351147	0.62202	0.03954
1440	0.351391	0.620318	0.01866
1441	0.351635	0.643019	0.017646
1442	0.351879	0.603859	0.00018
1443	0.352123	0.635074	0.001863
1444	0.352367	0.622588	0.005436
1445	0.352611	0.619183	0.010863
1446	0.352855	0.633371	0.040086
1447	0.353099	0.628263	0.010035
1448	0.353343	0.622588	0.038058
1449	0.353587	0.637344	0.039369
1450	0.353831	0.623723	0.029919
1451	0.354075	0.613507	0.024321
1452	0.354319	0.625993	0.014136
1453	0.354563	0.629966	0.003954
1454	0.354807	0.623723	0.006231
1455	0.355051	0.628831	0.016413
1456	0.355295	0.639047	0.01437
1457	0.355539	0.642452	0.03678
1458	0.355783	0.623723	0.02028
1459	0.356027	0.650965	0.023853
1460	0.356271	0.637911	0.012141
1461	0.356515	0.632236	0.00654
1462	0.356759	0.64983	0.000942
1463	0.357003	0.640182	0.007713
1464	0.357247	0.642452	0.034707
1465	0.357491	0.663451	0.017382
1466	0.357735	0.628831	0.038151
1467	0.35798	0.625426	0.031026
1468	0.358224	0.604994	0.009723
1469	0.358468	0.640182	0.030525
1470	0.358712	0.603859	0.012702
1471	0.358956	0.629398	0.019329
1472	0.3592	0.592509	0.012201
1473	0.359444	0.622588	0.008679
1474	0.359688	0.640749	0.002052
1475	0.359932	0.636776	0.021387
1476	0.360176	0.628831	0.027003
1477	0.36042	0.641884	0.000507
1478	0.360664	0.624858	0.007635
1479	0.360908	0.61748	0.023931
1480	0.361152	0.640749	0.032586
1481	0.361396	0.639047	0.035172
1482	0.36164	0.606697	0.015819
1483	0.361884	0.616913	0.023976
1484	0.362128	0.595914	0.00768
1485	0.362372	0.612372	0.033069
1486	0.362616	0.602724	0.008709
1487	0.36286	0.591373	0.026034
1488	0.363104	0.598751	0.010131
1489	0.363348	0.596481	0.012672
1490	0.363592	0.602157	0.033552
1491	0.363836	0.639614	0.035733
1492	0.36408	0.593076	0.019437
1493	0.364324	0.572645	0.012309
1494	0.364568	0.589671	0.016212
1495	0.364812	0.598184	0.037791
1496	0.365056	0.6084	0.03525
1497	0.3653	0.621453	0.020481
1498	0.365544	0.592509	0.008769
1499	0.365788	0.560159	0.00447
1500	0.366032	0.569807	0.016182
1501	0.366276	0.574347	0.034005
1502	0.36652	0.560726	0.024582
1503	0.366764	0.590238	0.000882
1504	0.367008	0.575482	0.012594
1505	0.367252	0.564699	0.015138
1506	0.367496	0.559024	0.026847
1507	0.36774	0.577185	0.027156
1508	0.367984	0.57605	0.032256
1509	0.368228	0.581158	0.020544
1510	0.368472	0.566969	0.003393
1511	0.368716	0.589103	0.000177
1512	0.36896	0.591941	0.028347
1513	0.369204	0.555619	0.009492
1514	0.369449	0.583428	0.006306
1515	0.369693	0.580023	0.003765
1516	0.369937	0.538025	0.024759
1517	0.370181	0.577753	0.033831
1518	0.370425	0.556754	0.006837
1519	0.370669	0.577753	0.019575
1520	0.370913	0.557321	0.004362
1521	0.371157	0.567537	0.032883
1522	0.371401	0.57378	0.03237
1523	0.371645	0.5437	0.023163
1524	0.371889	0.54597	0.000774
1525	0.372133	0.53916	0.031833
1526	0.372377	0.538025	0.031839
1527	0.372621	0.560159	0.009939
1528	0.372865	0.592509	0.002811
1529	0.373109	0.538025	0.018069
1530	0.373353	0.565834	0.034365
1531	0.373597	0.528377	0.007872
1532	0.373841	0.536322	0.007926
1533	0.374085	0.531782	0.011499
1534	0.374329	0.532917	0.02271
1535	0.374573	0.544268	0.02628
1536	0.374817	0.534052	0.003873
1537	0.375061	0.5437	0.005916
1538	0.375305	0.516459	0.033306
1539	0.375549	0.519864	0.028341
1540	0.375793	0.520431	0.004767
1541	0.376037	0.54143	0.02412
1542	0.376281	0.477866	0.025134
1543	0.376525	0.541998	0.007473
1544	0.376769	0.514188	0.01035
1545	0.377013	0.49546	0.008307
1546	0.377257	0.520431	0.023076
1547	0.377501	0.517594	0.026343
1548	0.377745	0.526674	0.014631
1549	0.377989	0.5	0.023061
1550	0.378233	0.551646	0.00879
1551	0.378477	0.511918	0.026874
1552	0.378721	0.50454	0.033501
1553	0.378965	0.522134	0.001923
1554	0.379209	0.491487	0.008262
1555	0.379453	0.492054	0.027615
1556	0.379697	0.487514	0.027918
1557	0.379941	0.484677	0.014679
1558	0.380185	0.482406	0.024543
1559	0.380429	0.465948	0.007218
1560	0.380673	0.455732	0.025041
1561	0.380918	0.45857	0.01368
1562	0.381162	0.510216	0.000441
1563	0.381406	0.458002	0.02388
1564	0.38165	0.470488	0.029097
1565	0.381894	0.468785	0.029493
1566	0.382138	0.464245	0.032652
1567	0.382382	0.442679	0.009126
1568	0.382626	0.447219	0.016341
1569	0.38287	0.46311	0.000987
1570	0.383114	0.434733	0.006141
1571	0.383358	0.471056	0.031053
1572	0.383602	0.439274	0.018867
1573	0.383846	0.461975	0.027495
1574	0.38409	0.412032	0.000501
1575	0.384334	0.418275	0.015795
1576	0.384578	0.437571	0.02445
1577	0.384822	0.413734	0.020385
1578	0.385066	0.3916	0.007146
1579	0.38531	0.41941	0.021378
1580	0.385554	0.416572	0.022392
1581	0.385798	0.414302	0.022443
1582	0.386042	0.397276	0.021429
1583	0.386286	0.356413	0.000549
1584	0.38653	0.43076	0.023388
1585	0.386774	0.35017	0.022974
1586	0.387018	0.367764	0.002091
1587	0.387262	0.363791	0.008721
1588	0.387506	0.345062	0.012162
1589	0.38775	0.320658	0.00822
1590	0.387994	0.335982	0.011793
1591	0.388238	0.295687	0.009249
1592	0.388482	0.315551	0.026577
1593	0.388726	0.397276	0.010278
1594	0.38897	0.324064	0.024549
1595	0.389214	0.353575	0.012837
1596	0.389458	0.333144	0.019464
1597	0.389702	0.324631	0.012114
1598	0.389946	0.329171	0.025356
1599	0.39019	0.290579	0.019479
1600	0.390434	0.319523	0.013629
1601	0.390678	0.275255	0.002415
1602	0.390922	0.251419	0.020241
1603	0.391166	0.262202	0.009027
1604	0.39141	0.211124	0.02991
1605	0.391654	0.253689	0.000357
1606	0.391898	0.246879	0.004743
1607	0.392143	0.224745	0.002202
1608	0.392387	0.219637	0.027168
1609	0.392631	0.205448	0.00594
1610	0.392875	0.237798	0.008481
1611	0.393119	0.206016	0.03024
1612	0.393363	0.217367	0.000189
1613	0.393607	0.155505	0.006939
1614	0.393851	0.215096	0.025671
1615	0.394095	0.213961	0.03036
1616	0.394339	0.173666	0.017529
1617	0.394583	0.210556	0.021102
1618	0.394827	0.233825	0.008949
1619	0.395071	0.230988	0.005379
1620	0.395315	0.181044	0.00945
1621	0.395559	0.202043	0.03033
1622	0.395803	0.190125	0.013005
1623	0.396047	0.136776	0.015018
1624	0.396291	0.215096	0.019617
1625	0.396535	0.141317	0.01299
1626	0.396779	0.129966	0.010449
1627	0.397023	0.202611	0.02319
1628	0.397267	0.118048	0.017592
1629	0.397511	0.183882	0.027276
1630	0.397755	0.184449	0.030285
1631	0.397999	0.139047	0.017544
1632	0.398243	0.207719	0.009387
1633	0.398487	0.170261	0.005817
1634	0.398731	0.177639	0.00234
1635	0.398975	0.1521	0.02007
1636	0.399219	0.19126	0.011913
1637	0.399463	0.154938	0.009996
1638	0.399707	0.213394	0.00477
1639	0.399951	0.124291	0.017139
1640	0.400195	0.113507	0.000687
1641	0.400439	0.159478	0.024624
1642	0.400683	0.074915	0.01104
1643	0.400927	0.151532	0.023595
1644	0.401171	0.099319	0.016968
1645	0.401415	0.103292	0.014925
1646	0.401659	0.105562	0.011571
1647	0.401903	0.1084	0.012366
1648	0.402147	0.042565	0.01338
1649	0.402391	0.137911	0.025341
1650	0.402635	0.089671	0.001404
1651	0.402879	0.065267	0.014145
1652	0.403123	0.074347	0.026886
1653	0.403367	0.100454	0.027618
1654	0.403612	0.114075	0.009576
1655	0.403856	0.043133	0.01773
1656	0.4041	0.08059	0.021489
1657	0.404344	0.038025	0.018759
1658	0.404588	0.019296	0.025044
1659	0.404832	0.001135	0.004506
1660	0.405076	0.012486	0.007206
1661	0.40532	0.024972	0.017388
1662	0.405564	0.042565	0.010761
1663	0.405808	0.005108	0.017262
1664	0.406052	0.026107	0.008607
1665	0.406296	0.017026	0.018291
1666	0.40654	0.014188	0.000468
1667	0.406784	0.047673	0.002076
1668	0.407028	0.056186	0.016842
1669	0.407272	0.070942	0.017856
1670	0.407516	0.111805	0.026511
1671	0.40776	0.101589	0.018354
1672	0.408004	0.061862	0.0102
1673	0.408248	0.116913	0.02241
1674	0.408492	0.060726	0.02598
1675	0.408736	0.062997	0.010185
1676	0.40898	0.041998	0.005085
1677	0.409224	0.061862	0.025995
1678	0.409468	0.091941	0.007113
1679	0.409712	0.116345	0.014799
1680	0.409956	0.11294	0.016842
1681	0.4102	0.111237	0.019323
1682	0.410444	0.048241	0.012696
1683	0.410688	0.122588	0.004539
1684	0.410932	0.007946	0.004026
1685	0.411176	0.136776	0.008715
1686	0.41142	0.093644	0.024513
1687	0.411664	0.145857	0.023877
1688	0.411908	0.114642	0.022485
1689	0.412152	0.106697	0.007719
1690	0.412396	0.109535	0.000591
1691	0.41264	0.085698	0.005691
1692	0.412884	0.144722	0.006204
1693	0.413128	0.081725	0.022317
1694	0.413372	0.082293	0.01569
1695	0.413616	0.121453	0.015174
1696	0.41386	0.12202	0.025359
1697	0.414104	0.135641	0.013362
1698	0.414348	0.166288	0.013632
1699	0.414592	0.171964	0.010059
1700	0.414837	0.097616	0.017964
1701	0.415081	0.200908	0.003195
1702	0.415325	0.141884	0.012879
1703	0.415569	0.099886	0.015642
1704	0.415813	0.174801	0.000153
1705	0.416057	0.116913	0.005445
1706	0.416301	0.161748	0.01257
1707	0.416545	0.177639	0.001359
1708	0.416789	0.127128	0.017496
1709	0.417033	0.212826	0.005784
1710	0.417277	0.19126	0.025797
1711	0.417521	0.15664	0.003756
1712	0.417765	0.185585	0.020181
1713	0.418009	0.162316	0.021597
1714	0.418253	0.185017	0.022209
1715	0.418497	0.197503	0.014052
1716	0.418741	0.218502	0.012441
1717	0.418985	0.15664	0.014484
1718	0.419229	0.224745	0.000282
1719	0.419473	0.295119	0.004815
1720	0.419717	0.207719	0.000747
1721	0.419961	0.261635	0.013488
1722	0.420205	0.237798	0.003303
1723	0.420449	0.213961	0.025215
1724	0.420693	0.253689	0.019614
1725	0.420937	0.243473	0.007905
1726	0.421181	0.284904	0.006864
1727	0.421425	0.214529	0.021159
1728	0.421669	0.246879	0.01806
1729	0.421913	0.244041	0.009906
1730	0.422157	0.259364	0.003279
1731	0.422401	0.267877	0.021102
1732	0.422645	0.237798	0.00072
1733	0.422889	0.257662	0.00285
1734	0.423133	0.253121	0.001218
1735	0.423377	0.288876	0.003762
1736	0.423621	0.245176	0.000189
1737	0.423865	0.257094	0.012552
1738	0.424109	0.31328	0.005274
1739	0.424353	0.321793	0.008994
1740	0.424597	0.26958	0.019527
1741	0.424841	0.293984	0.016137
1742	0.425085	0.237798	0.013596
1743	0.425329	0.238365	0.00423
1744	0.425573	0.240068	0.022053
1745	0.425817	0.279796	0.001386
1746	0.426061	0.253121	0.001158
1747	0.426306	0.276958	0.013113
1748	0.42655	0.290579	0.013626
1749	0.426794	0.238933	0.016425
1750	0.427038	0.250284	0.02355
1751	0.427282	0.290011	0.001416
1752	0.427526	0.238365	0.01488
1753	0.42777	0.260499	0.0162
1754	0.428014	0.268445	0.009072
1755	0.428258	0.274688	0.010281
1756	0.428502	0.334279	0.020799
1757	0.428746	0.283201	0.015366
1758	0.42899	0.281498	0.01266
1759	0.429234	0.330874	0.014703
1760	0.429478	0.295119	0.00618
1761	0.429722	0.275823	0.022476
1762	0.429966	0.279228	0.014718
1763	0.43021	0.305335	0.006063
1764	0.430454	0.261067	0.021861
1765	0.430698	0.265607	0.019317
1766	0.430942	0.307605	0.006147
1767	0.431186	0.302497	0.020916
1768	0.43143	0.30647	0.00405
1769	0.431674	0.309875	0.010677
1770	0.431918	0.245176	0.008136
1771	0.432162	0.250851	0.00816
1772	0.432406	0.258797	0.012231
1773	0.43265	0.312145	0.015792
1774	0.432894	0.313848	0.020892
1775	0.433138	0.319523	1.2e-05
1776	0.433382	0.298524	0.009696
1777	0.433626	0.275255	0.001041
1778	0.43387	0.292281	0.013782
1779	0.434114	0.296254	0.011238
1780	0.434358	0.257094	0.004113
1781	0.434602	0.261635	0.01677
1782	0.434846	0.279796	0.01431
1783	0.43509	0.298524	0.017883
1784	0.435334	0.275823	0.012168
1785	0.435578	0.274688	0.006684
1786	0.435822	0.27185	0.010257
1787	0.436066	0.277526	0.006039
1788	0.43631	0.295687	0.01587
1789	0.436554	0.293984	0.011124
1790	0.436798	0.325766	0.018429
1791	0.437042	0.26731	0.005511
1792	0.437286	0.304767	0.014166
1793	0.437531	0.291714	0.006009
1794	0.437775	0.242906	0.016191
1795	0.438019	0.309308	0.001134
1796	0.438263	0.262202	0.019749
1797	0.438507	0.296822	0.00522
1798	0.438751	0.294552	0.001908
1799	0.438995	0.250851	0.009036
1800	0.439239	0.3042	0.002406
1801	0.439483	0.292849	0.012591
1802	0.439727	0.275255	0.009321
1803	0.439971	0.288309	0.011364
1804	0.440215	0.278661	0.007989
1805	0.440459	0.295687	0.01359
1806	0.440703	0.292849	0.014601
1807	0.440947	0.309308	0.018672
1808	0.441191	0.250851	0.002874
1809	0.441435	0.286039	0.008475
1810	0.441679	0.313848	0.003375
1811	0.441923	0.297957	0.012423
1812	0.442167	0.282066	0.019155
1813	0.442411	0.310443	0.007944
1814	0.442655	0.300227	0.015069
1815	0.442899	0.266175	0.009897
1816	0.443143	0.292281	0.013467
1817	0.443387	0.282633	0.018567
1818	0.443631	0.286606	0.0069
1819	0.443875	0.286039	0.017082
1820	0.444119	0.313848	0.013998
1821	0.444363	0.293417	0.016041
1822	0.444607	0.313848	0.004329
1823	0.444851	0.307037	0.002799
1824	0.445095	0.299659	0.011472
1825	0.445339	0.313848	0.005874
1826	0.445583	0.300227	0.005838
1827	0.445827	0.310443	0.005325
1828	0.446071	0.309875	0.006339
1829	0.446315	0.315551	0.007353
1830	0.446559	0.297389	0.016008
1831	0.446803	0.26958	0.010908
1832	0.447047	0.299092	0.014979
1833	0.447291	0.318956	0.00846
1834	0.447535	0.308173	0.002862
1835	0.447779	0.295119	0.017133
1836	0.448023	0.309875	0.017646
1837	0.448267	0.280363	0.004764
1838	0.448511	0.303065	0.00645
1839	0.448755	0.268445	0.014433
1840	0.449	0.294552	0.01512
1841	0.449244	0.255959	0.014106
1842	0.449488	0.245743	0.005247
1843	0.449732	0.31328	0.010845
1844	0.449976	0.31328	0.011064
1845	0.45022	0.295119	0.013107
1846	0.450464	0.241203	0.010566
1847	0.450708	0.26277	0.011082
1848	0.450952	0.244608	0.014652
1849	0.451196	0.241203	0.016695
1850	0.45144	0.226447	0.001926
1851	0.451684	0.216799	0.01437
1852	0.451928	0.218502	0.006012
1853	0.452172	0.258229	0.014868
1854	0.452416	0.266175	0.011298
1855	0.45266	0.261067	0.001443
1856	0.452904	0.279228	0.007212
1857	0.453148	0.275255	0.000945
1858	0.453392	0.248014	0.001458
1859	0.453636	0.253689	0.005028
1860	0.45388	0.251419	0.004017
1861	0.454124	0.216232	0.00606
1862	0.454368	0.261067	0.001989
1863	0.454612	0.274688	0.002502
1864	0.454856	0.224745	0.001488
1865	0.4551	0.266175	0.00258
1866	0.455344	0.286606	0.012765
1867	0.455588	0.238365	0.007665
1868	0.455832	0.257662	0.00966
1869	0.456076	0.254824	0.01122
1870	0.45632	0.258797	0.003066
1871	0.456564	0.278093	0.011721
1872	0.456808	0.278661	0.015789
1873	0.457052	0.250284	0.009177
1874	0.457296	0.260499	0.005106
1875	0.45754	0.241203	0.002019
1876	0.457784	0.255392	0.006135
1877	0.458028	0.254824	0.011235
1878	0.458272	0.247446	0.014232
1879	0.458516	0.233258	0.010737
1880	0.45876	0.249716	0.003609
1881	0.459004	0.245176	0.002595
1882	0.459248	0.249716	0.00453
1883	0.459492	0.268445	0.005154
1884	0.459736	0.251986	0.00261
1885	0.45998	0.226447	0.006183
1886	0.460224	0.255392	0.005169
1887	0.460469	0.216799	0.011127
1888	0.460713	0.265607	0.003141
1889	0.460957	0.278093	0.008241
1890	0.461201	0.258229	0.0057
1891	0.461445	0.240068	9.9e-05
1892	0.461689	0.258797	0.014667
1893	0.461933	0.254824	0.004983
1894	0.462177	0.250851	0.013638
1895	0.462421	0.245743	0.007011
1896	0.462665	0.212259	0.012609
1897	0.462909	0.213961	0.013623
1898	0.463153	0.229852	0.006996
1899	0.463397	0.227015	0.013386
1900	0.463641	0.240068	0.012078
1901	0.463885	0.227582	0.012888
1902	0.464129	0.244608	0.00576
1903	0.464373	0.222474	0.001365
1904	0.464617	0.220772	0.01155
1905	0.464861	0.219069	0.000336
1906	0.465105	0.200341	0.000177
1907	0.465349	0.185017	0.00375
1908	0.465593	0.1958	0.00732
1909	0.465837	0.190692	0.000192
1910	0.466081	0.194665	0.009876
1911	0.466325	0.190692	0.001833
1912	0.466569	0.169126	0.005904
1913	0.466813	0.203746	0.003861
1914	0.467057	0.172531	0.001239
1915	0.467301	0.199205	0.000225
1916	0.467545	0.178774	0.006852
1917	0.467789	0.170829	0.013479
1918	0.468033	0.161748	0.009408
1919	0.468277	0.14983	0.011451
1920	0.468521	0.161748	0.001788
1921	0.468765	0.152667	0.008916
1922	0.469009	0.178774	0.008412
1923	0.469253	0.188422	0.005868
1924	0.469497	0.19353	0.006384
1925	0.469741	0.18899	0.005328
1926	0.469985	0.203746	0.001758
1927	0.470229	0.167423	0.001242
1928	0.470473	0.183882	0.005313
1929	0.470717	0.164586	0.00327
1930	0.470961	0.15891	0.005811
1931	0.471205	0.173666	0.005298
1932	0.471449	0.164586	0.0105
1933	0.471694	0.171396	0.01191
1934	0.471938	0.167423	0.003888
1935	0.472182	0.160045	0.004404
1936	0.472426	0.164586	0.001197
1937	0.47267	0.173099	0.010017
1938	0.472914	0.170261	0.001695
1939	0.473158	0.143587	0.008823
1940	0.473402	0.124291	0.000666
1941	0.473646	0.169694	0.004737
1942	0.47389	0.140749	0.000363
1943	0.474134	0.12202	0.005235
1944	0.474378	0.158343	0.004449
1945	0.474622	0.135074	0.001149
1946	0.474866	0.12202	0.000894
1947	0.47511	0.137911	0.002937
1948	0.475354	0.156073	0.000393
1949	0.475598	0.115778	0.003966
1950	0.475842	0.141884	0.007536
1951	0.476086	0.132804	0.001938
1952	0.47633	0.131101	0.002454
1953	0.476574	0.139047	0.004497
1954	0.476818	0.129966	0.003483
1955	0.477062	0.095346	0.002118
1956	0.477306	0.104427	0.002982
1957	0.47755	0.091373	0.00873
1958	0.477794	0.078888	0.007068
1959	0.478038	0.107264	0.00147
1960	0.478282	0.107832	0.003513
1961	0.478526	0.080023	0.002499
1962	0.47877	0.104994	0.004629
1963	0.479014	0.123156	0.004113
1964	0.479258	0.128831	0.005571
1965	0.479502	0.095346	0.001557
1966	0.479746	0.139047	0.000486
1967	0.47999	0.097616	0.000525
1968	0.480234	0.081158	0.009159
1969	0.480478	0.108967	0.003558
1970	0.480722	0.095914	0.005097
1971	0.480966	0.099886	0.009165
1972	0.48121	0.114642	0.00816
1973	0.481454	0.1084	0.008673
1974	0.481698	0.123723	0.001509
1975	0.481942	0.100454	0.007107
1976	0.482186	0.113507	0.002577
1977	0.48243	0.11294	0.003021
1978	0.482674	0.094779	0.003606
1979	0.482918	0.094779	0.000465
1980	0.483163	0.108967	0.003006
1981	0.483407	0.100454	0.002493
1982	0.483651	0.11067	0.005034
1983	0.483895	0.101022	0.007575
1984	0.484139	0.111805	0.007062
1985	0.484383	0.091373	0.006546
1986	0.484627	0.132236	0.004503
1987	0.484871	0.107264	0.003651
1988	0.485115	0.089103	0.00111
1989	0.485359	0.079455	0.004488
1990	0.485603	0.08059	0.000612
1991	0.485847	0.080023	0.000402
1992	0.486091	0.086833	0.001641
1993	0.486335	0.090806	0.002154
1994	0.486579	0.084563	0.000387
1995	0.486823	0.087401	0.001401
1996	0.487067	0.089671	0.000885
1997	0.487311	0.086266	0.001899
1998	0.487555	0.084563	0.004728
1999	0.487799	0.077185	0.003927
[truncated: 50 more rows]

[truncated: 1 more sheets: 12bit]
